# Supplementary material for: Obtaining Human Ischemic Stroke Gene Expression Biomarkers from Animal Models: A Cross-species Validation Study
Source: PubMed Central journal article supplement (PMC4942769; doi:10.1038/srep29693), 2016-07-13
Supplement: srep29693-s1.pdf [file srep29693-s1.pdf]

# Obtaining Human Ischemic Stroke Gene Expression Biomarkers from Animal Models: A Cross-species

## Validation Study

Yingying Wang, Yunpeng Cai

**Table S1** The detail information of top-ranked mRNAs

| Rank | Gene Symbol | Entrez Gene ID | Category                                                                                                          | PMID/URLs                                                                                                                                                                                                                                                                                                                                                                          | Species | Tissue | Experiment Type | Number of related top miRNAs |
|------|-------------|----------------|-------------------------------------------------------------------------------------------------------------------|------------------------------------------------------------------------------------------------------------------------------------------------------------------------------------------------------------------------------------------------------------------------------------------------------------------------------------------------------------------------------------|---------|--------|-----------------|------------------------------|
| 1    | MAFK        | 7975           | -                                                                                                                 | -                                                                                                                                                                                                                                                                                                                                                                                  | -       | -      | -               | 16                           |
| 2    | TESC        | 54997          | Genes interacted with /binding with/ regulate stroke-related factors                                              | PMID:17339567; 15674430                                                                                                                                                                                                                                                                                                                                                            | -       | -      | -               | 7                            |
| 3    | SIK1        | 150094         | ①Genes involved in biological processes accompanied with or after stroke<br>②Potential stroke therapeutic targets | <a href="http://connection.ebscohost.com/c/articles/58018898/pass-up-salt-inducible-kinase-stroke-survival">http://connection.ebscohost.com/c/articles/58018898/pass-up-salt-inducible-kinase-stroke-survival</a> ;<br><a href="http://link.springer.com/chapter/10.1007%2F978-1-4419-9663-3_15#page-1">http://link.springer.com/chapter/10.1007%2F978-1-4419-9663-3_15#page-1</a> | -       | -      | -               | 16                           |
| 4    | PER1        | 5187           | Genes that have been previously reported to be differentially expressed among stroke and healthy subjects         | PMID: 17936274                                                                                                                                                                                                                                                                                                                                                                     | -       | -      | -               | 16                           |
| 5    | NUMB        | 8650           | Genes involved in stroke recovery;<br>Genes interacted with /binding with/ regulate stroke-related factors        | PMID: 19138666; 26051664                                                                                                                                                                                                                                                                                                                                                           | Human   | Blood  | Immunoassay     | 22                           |

|    |        |        |                                                                                                           |                                    |       |       |                                                                        |    |
|----|--------|--------|-----------------------------------------------------------------------------------------------------------|------------------------------------|-------|-------|------------------------------------------------------------------------|----|
| 6  | DMP1   | 1758   | -                                                                                                         | -                                  | -     | -     | -                                                                      | 9  |
| 7  | JUN    | 3725   | Genes interacted with /binding with/ regulate stroke-related factors                                      | PMID: 12944025                     | -     | -     | -                                                                      | 7  |
| 8  | LIPE   | 3991   | Genes involved in biological processes accompanied with or after stroke                                   | PMID: 26274054                     | Human | Blood | -                                                                      | 7  |
| 9  | PLAT   | 5327   | Potential stroke therapeutic targets                                                                      | PMID: 26247772; 15016487           | Human | Blood | -                                                                      | 8  |
| 10 | RTEL1  | 51750  | -                                                                                                         | -                                  | -     | -     | -                                                                      | 0  |
| 11 | WDR91  | 29062  | -                                                                                                         | -                                  | -     | -     | -                                                                      | 17 |
| 12 | BTG2   | 7832   | Genes that have been previously reported to be differentially expressed among stroke and healthy subjects | PMID: 24112606                     | Rat   | Brain | Western blotting                                                       | 17 |
| 13 | IQSEC3 | 440073 | -                                                                                                         | -                                  | -     | -     | -                                                                      | 12 |
| 14 | NPAS4  | 266743 | Genes that have been previously reported to be differentially expressed among stroke and healthy subjects | PMID: 17156197; 24669275; 23431968 | Rat   | Brain | Expression profiles; Northern blots; PCR; Immunohistochemistry; RT-PCR | 17 |
| 15 | CAMKK1 | 84254  | Genes encoding proteins that were in the same family of known stroke-related proteins                     | PMID: 25331941                     | Mouse | Brain | Hemoglobin assay; Immunoblotting                                       | 11 |
| 16 | TTC22  | 55001  | Genes encoding proteins that were in the same family of known stroke-related proteins                     | PMID: 22453632                     | Human | Blood | Microarray                                                             | 9  |
| 17 | ADRA1B | 147    | Potential stroke therapeutic targets                                                                      | PMID: 22860001                     | Rat   | Brain | -                                                                      | 6  |
| 18 | TCF25  | 22980  | -                                                                                                         | -                                  | -     | -     | -                                                                      | 7  |

|    |         |       |                                                                                                             |                                       |                |                     |                                         |    |
|----|---------|-------|-------------------------------------------------------------------------------------------------------------|---------------------------------------|----------------|---------------------|-----------------------------------------|----|
| 19 | CRHBP   | 1393  | Genes that have been previously reported to be differentially expressed among stroke and healthy subjects   | PMID: 23251410                        | Rat            | Brain               | Microarray                              | 3  |
| 20 | SMOX    | 54498 | Genes that have been previously reported to be differentially expressed among stroke and healthy subjects   | PMID: 16269634                        | Human          | Blood               | Liquid chromatography and ELISA         | 11 |
| 21 | CHPF2   | 54480 | -                                                                                                           | -                                     | -              | -                   | -                                       | 6  |
| 22 | TOB2    | 10766 | Genes encoding proteins that were in the same family of known stroke-related proteins                       | PMID: 19468252                        | Human          | Brain               | Immunohistochemistry; Western blotting  | 19 |
| 23 | GNE     | 10020 | ①Genes involved in stroke recovery<br>②Genes interacted with /binding with/ regulate stroke-related factors | PMID: 22224242                        | Human          | Cerebrospinal fluid | -                                       | 22 |
| 24 | SCG2    | 7857  | Genes involved in biological processes accompanied with or after stroke                                     | PMID: 18079966                        | Human;<br>Rat  | Brain               | Western blot                            | 11 |
| 25 | GADD45G | 10912 | Genes encoding proteins that were in the same family of known stroke-related proteins                       | PMID: 25678854                        | Rat            | Brain               | Immunohistochemistry; Western blot      | 4  |
| 26 | PDE4B   | 5142  | Genes encoding proteins that were in the same family of known stroke-related proteins                       | PMID: 24011921                        | Mouse          | Brain               | -                                       | 22 |
| 27 | CIRBP   | 1153  | Genes involved in biological processes accompanied with or after stroke                                     | PMID: 24613680                        | Mouse          | Brain               | Immunohistochemistry; PCR; Western blot | 22 |
| 28 | ANXA11  | 311   | Genes encoding proteins that were in the same family of known stroke-related                                | PMID: 26205642; 24368559;<br>25345638 | Mouse;<br>Rat; | Brain;<br>Blood     | RT-PCR;<br>Western blot,                | 17 |

|    |         |       |                                                                         |                |       |                 |                                                                                        |    |
|----|---------|-------|-------------------------------------------------------------------------|----------------|-------|-----------------|----------------------------------------------------------------------------------------|----|
|    |         |       | proteins                                                                |                | Human |                 | Immunofluorescence;<br>Immunohistochemistry; PCR;<br>enzyme-linked immunosorbent assay |    |
| 29 | GNL3    | 26354 | Genes interacted with /binding with/ regulate stroke-related factors    | PMID: 25779964 | Mouse | Brain           | Immunohistochemical                                                                    | 1  |
| 30 | PGLYRP1 | 8993  | Genes involved in biological processes accompanied with or after stroke | PMID: 22167233 | Human | Blood           | Microarray                                                                             | 3  |
| 31 | AZIN1   | 51582 | Genes interacted with /binding with/ regulate stroke-related factors    | PMID: 19832840 | Human | Brain           | Immunohistochemistry; Western blotting;<br>RT-PCR                                      | 19 |
| 32 | CAMK1G  | 57172 | Genes involved in biological processes accompanied with or after stroke | PMID: 23868268 | Mouse | Brain           | -                                                                                      | 7  |
| 33 | ASPA    | 443   | Genes involved in biological processes accompanied with or after stroke | PMID: 25497124 | -     | -               | -                                                                                      | 4  |
| 34 | ARTN    | 9048  | Genes involved in biological processes accompanied with or after stroke | PMID: 11564414 | Rat   | Brain           | Immunohistochemistry                                                                   | 6  |
| 35 | NFIL3   | 4783  | Genes interacted with /binding with/ regulate stroke-related factors    | PMID: 17936274 | -     | -               | -                                                                                      | 6  |
| 36 | NOTCH4  | 4855  | Genes involved in biological processes accompanied with or after stroke | PMID: 25468970 | Mouse | Brain;<br>Blood | Immunostaining                                                                         | 29 |
| 37 | BHLHE40 | 8553  | Genes interacted with /binding with/                                    | PMID: 17936274 | -     | -               | -                                                                                      | 15 |

|    |         |        |                                                                         |                          |       |       |                                            |    |
|----|---------|--------|-------------------------------------------------------------------------|--------------------------|-------|-------|--------------------------------------------|----|
|    |         |        | regulate stroke-related factors                                         |                          |       |       |                                            |    |
| 38 | PLA1A   | 51365  | Genes involved in biological processes accompanied with or after stroke | PMID: 26274054           | Human | Blood | -                                          | 10 |
| 39 | MRPS34  | 65993  |                                                                         | -                        | -     | -     | -                                          | 4  |
| 40 | RIMBP2  | 23504  |                                                                         | -                        | -     | -     | -                                          | 23 |
| 41 | CMIP    | 80790  | Genes interacted with /binding with/ regulate stroke-related factors    | PMID: 24319262           | Mouse | Brain | Quantitative PCR; Western Blot             | 13 |
| 42 | MRPL41  | 64975  | Genes interacted with /binding with/ regulate stroke-related factors    | PMID: 15547950; 25722793 | Rat   | Brain | Immunohistochemistry; Western Blot; RT-PCR | 0  |
| 43 | CNKS3   | 154043 | -                                                                       | -                        | -     | -     | -                                          | 14 |
| 44 | PCSK2   | 5126   | Genes transcribed from stroke related genomic mutations                 | PMID: 20036365           | Human | Blood | Microarray                                 | 15 |
| 45 | KIFC2   | 90990  | -                                                                       | -                        | -     | -     | -                                          | 10 |
| 46 | RASL11A | 387496 | -                                                                       | -                        | -     | -     | -                                          | 1  |
| 47 | FEM1B   | 10116  | -                                                                       | -                        | -     | -     | -                                          | 1  |
| 48 | CAMK2G  | 818    | Genes involved in stroke recovery                                       | PMID: 25423262           | Rat   | Brain | Bead arrays; PCR                           | 20 |
| 49 | TYRO3   | 7301   | Genes involved in biological processes accompanied with or after stroke | PMID: 20664904           | Human | Blood | RT-PCR                                     | 19 |
| 50 | SEC61A2 | 55176  | -                                                                       | -                        | -     | -     | -                                          | 23 |
| 51 | SORBS2  | 8470   | -                                                                       | -                        | -     | -     | -                                          | 23 |
| 52 | LENG1   | 79165  | -                                                                       | -                        | -     | -     | -                                          | 1  |
| 53 | GADD45B | 4616   | Genes involved in processes causing stroke onset and development        | PMID: 25678854           | Rat   | Brain | Immunohistochemistry; Western              | 7  |

|    |         |        |                                                                                                                                      |                |       |       |                        |    |
|----|---------|--------|--------------------------------------------------------------------------------------------------------------------------------------|----------------|-------|-------|------------------------|----|
|    |         |        |                                                                                                                                      |                |       |       | blot                   |    |
| 54 | INPP4A  | 3631   | -                                                                                                                                    | -              | -     | -     | -                      | 8  |
| 55 | PMEPA1  | 56937  | -                                                                                                                                    | -              | -     | -     | -                      | 15 |
| 56 | SYT12   | 91683  | -                                                                                                                                    | -              | -     | -     | -                      | 11 |
| 57 | ZMYND8  | 23613  | -                                                                                                                                    | -              | -     | -     | -                      | 21 |
| 58 | KCNH1   | 3756   | -                                                                                                                                    | -              | -     | -     | -                      | 8  |
| 59 | CADM4   | 199731 | -                                                                                                                                    | -              | -     | -     | -                      | 11 |
| 60 | BEND5   | 79656  | -                                                                                                                                    | -              | -     | -     | -                      | 6  |
| 61 | LIMK1   | 3984   | ①Genes transcribed from stroke related genomic mutations<br>②Genes involved in biological processes accompanied with or after stroke | PMID: 18566305 | Human | Blood | Microarray             | 16 |
| 62 | COQ7    | 10229  | -                                                                                                                                    | PMID: 20170652 | Mouse | Brain | -                      | 12 |
| 63 | HS3ST2  | 9956   | -                                                                                                                                    | -              | -     | -     | -                      | 15 |
| 64 | BAI1    | 575    | ①Genes involved in biological processes accompanied with or after stroke<br>②Potential stroke therapeutic targets                    | PMID: 21509575 | -     | -     | -                      | 0  |
| 65 | UPP1    | 7378   | -                                                                                                                                    | -              | -     | -     | -                      | 3  |
| 66 | PITPNM1 | 9600   | -                                                                                                                                    | -              | -     | -     | -                      | 6  |
| 67 | TLE3    | 7090   | -                                                                                                                                    | -              | -     | -     | -                      | 15 |
| 68 | MAP3K6  | 9064   | -                                                                                                                                    | -              | -     | -     | -                      | 10 |
| 69 | TSPAN2  | 10100  | Genes involved in biological processes accompanied with or after stroke                                                              | PMID: 20883670 | Rat   | Brain | Microarray;<br>qRT-PCR | 16 |
| 70 | FXR2    | 9513   | -                                                                                                                                    | -              | -     | -     | -                      | 23 |

|    |           |        |                                                                                                           |                          |       |       |                       |    |
|----|-----------|--------|-----------------------------------------------------------------------------------------------------------|--------------------------|-------|-------|-----------------------|----|
| 71 | CORO6     | 84940  | Genes involved in biological processes accompanied with or after stroke                                   | PMID: 25882105; 24886966 | -     | -     | -                     | 11 |
| 72 | PLEKHG3   | 26030  | -                                                                                                         | -                        | -     | -     | -                     | 11 |
| 73 | CREM      | 1390   | -                                                                                                         | -                        | -     | -     | -                     | 22 |
| 74 | MARK1     | 4139   | -                                                                                                         | -                        | -     | -     | -                     | 25 |
| 75 | DUSP1     | 1843   | Genes that have been previously reported to be differentially expressed among stroke and healthy subjects | PMID: 25135788           | Human | Blood | Microarray; (RT)-qPCR | 12 |
| 76 | RASSF5    | 83593  | -                                                                                                         | -                        | -     | -     | -                     | 0  |
| 77 | PAK1IP1   | 55003  | -                                                                                                         | -                        | -     | -     | -                     | 2  |
| 78 | MARCKS L1 | 65108  | -                                                                                                         | -                        | -     | -     | -                     | 20 |
| 79 | GORAB     | 92344  | -                                                                                                         | -                        | -     | -     | -                     | 16 |
| 80 | DSCAM     | 1826   | -                                                                                                         | -                        | -     | -     | -                     | 14 |
| 81 | WASF1     | 8936   | -                                                                                                         | -                        | -     | -     | -                     | 11 |
| 82 | RTN4RL2   | 349667 | -                                                                                                         | -                        | -     | -     | -                     | 2  |
| 83 | STRN3     | 29966  | -                                                                                                         | -                        | -     | -     | -                     | 17 |
| 84 | COQ10B    | 80219  | -                                                                                                         | -                        | -     | -     | -                     | 6  |
| 85 | ALDH1A1   | 216    | -                                                                                                         | -                        | -     | -     | -                     | 6  |
| 86 | PHRF1     | 57661  | -                                                                                                         | -                        | -     | -     | -                     | 5  |
| 87 | KCNK12    | 56660  | -                                                                                                         | -                        | -     | -     | -                     | 7  |
| 88 | GRIK5     | 2901   | -                                                                                                         | -                        | -     | -     | -                     | 10 |
| 89 | LURAP1L   | 286343 | -                                                                                                         | -                        | -     | -     | -                     | 16 |
| 90 | MAPK8IP1  | 9479   | -                                                                                                         | -                        | -     | -     | -                     | 3  |
| 91 | KLF9      | 687    | -                                                                                                         | -                        | -     | -     | -                     | 18 |

|     |         |        |                                                                                                           |                |               |                 |                             |    |
|-----|---------|--------|-----------------------------------------------------------------------------------------------------------|----------------|---------------|-----------------|-----------------------------|----|
| 92  | CRY1    | 1407   | Genes that have been previously reported to be differentially expressed among stroke and healthy subjects | PMID: 24418196 | Human         | Carotid plaques | Immunofluorescence; qRT-PCR | 9  |
| 93  | GPR162  | 27239  | -                                                                                                         | -              | -             | -               | -                           | 1  |
| 94  | SESN1   | 27244  | -                                                                                                         | -              | -             | -               | -                           | 22 |
| 95  | SLC35F4 | 341880 | -                                                                                                         | -              | -             | -               | -                           | 5  |
| 96  | CCRN4L  | 25819  | -                                                                                                         | -              | -             | -               | -                           | 0  |
| 97  | TENM3   | 55714  | -                                                                                                         | -              | -             | -               | -                           | 16 |
| 98  | ADRM1   | 11047  | -                                                                                                         | -              | -             | -               | -                           | 9  |
| 99  | PFKP    | 5214   | -                                                                                                         | -              | -             | -               | -                           | 16 |
| 100 | CYP46A1 | 10858  | Genes involved in processes causing stroke onset and development                                          | PMID: 22343944 | Rat;<br>Mouse | Brain           | -                           | 21 |

**Table S2 The detail information of top-ranked miRNAs**

| Rank | miRNA_id       | Previous ID | Sequence                | Family  | Category                                                                                                    | PMID                  | Number of targets in top 100 genes |
|------|----------------|-------------|-------------------------|---------|-------------------------------------------------------------------------------------------------------------|-----------------------|------------------------------------|
| 1    | mmu-miR-665-3p | mmu-miR-665 | accaggaggcugaggucuu     | mir-665 | miRNAs that have been previously reported to be differentially expressed across stroke samples and subtypes | 19888324              | 33                                 |
| 2    | mmu-miR-21-5p  | mmu-miR-21* | uagcuuaucaagacugauguuga | mir-21  | miRNAs that have been previously reported to be differentially expressed across stroke samples and subtypes | 19888324;<br>23860376 | 12                                 |



|    |                 |                |                         |         |                                                                                                             |          |    |
|----|-----------------|----------------|-------------------------|---------|-------------------------------------------------------------------------------------------------------------|----------|----|
| 3  | mmu-miR-675-5p  | -              | uggugcggaaagggcccacagu  | mir-675 | miRNAs in the same family of known stroke markers                                                           | 24574964 | 33 |
| 4  | mmu-miR-291a-5p | -              | caucaaaguggaggcccucucu  | mir-290 | miRNAs involved in biological processes accompanied with or after stroke                                    | 24373752 | 29 |
| 5  | hsa-miR-184     | -              | uggacggagaacugauaaggggu | mir-184 | miRNAs that have been previously reported to be differentially expressed across stroke samples and subtypes | 19888324 | 28 |
| 6  | mmu-miR-290a-5p | mmu-miR-290-5p | acucaaacuauagggggcacuuu | mir-290 | miRNAs in the same family of known stroke markers                                                           | 18258830 | 0  |
| 7  | hsa-miR-877-5p  | hsa-miR-877    | guagaggagauggcgcaggg    | mir-877 | miRNAs that have been previously reported to be differentially expressed across stroke samples and subtypes | 19888324 | 30 |
| 8  | mmu-miR-294-5p  | mmu-miR-294*   | acucaaauggaggcccauucu   | mir-290 | miRNAs in the same family of known stroke markers                                                           | 18258830 | 0  |
| 9  | mmu-miR-300-5p  | mmu-miR-300*   | uugaagagagguuauccuuugu  | mir-154 | miRNAs that have been previously reported to be differentially expressed across stroke samples and subtypes | 19888324 | 0  |
| 10 | rno-miR-204-5p  | rno-miR-204*   | uucccuuugucauccuagccu   | mir-204 | --                                                                                                          | --       | 0  |
| 11 | hsa-miR-130b-3p | hsa-miR-130b   | cagugcaaugaugaaaggcrau  | mir-130 | miRNAs that have been previously reported to be differentially expressed across stroke samples and subtypes | 19888324 | 33 |

|    |                  |                |                         |         |                                                                                                             |          |    |
|----|------------------|----------------|-------------------------|---------|-------------------------------------------------------------------------------------------------------------|----------|----|
| 12 | hsa-miR-223-3p   | hsa-miR-223    | ugucaguuuugucaauacccca  | mir-223 | miRNAs that have been previously reported to be differentially expressed across stroke samples and subtypes | 24708646 | 27 |
| 13 | mmu-miR-503-5p   | mmu-miR-503    | uagcagcgggaacaguacugcag | mir-503 | --                                                                                                          | --       | 40 |
| 14 | hsa-miR-129-5p   | -              | cuuuuugcggucugggcuugc   | mir-129 | miRNAs involved in biological processes accompanied with or after stroke                                    | 19523330 | 38 |
| 15 | mmu-miR-351-5p   | mmu-miR-351    | ucccugaggagccuuugagccug | mir-351 | --                                                                                                          | --       | 0  |
| 16 | hsa-miR-542-5p   | -              | ucggggaucaucaugucacgaga | mir-542 | --                                                                                                          | --       | 20 |
| 17 | rno-miR-466c-5p  | rno-miR-466c   | ugugauguguguauaguacaug  | mir-467 | --                                                                                                          | --       | 0  |
| 18 | rno-miR-494-3p   | rno-miR-494    | ugaaacauacacgggaaccucu  | mir-154 | miRNAs involved in processes causing stroke onset and development                                           | 26583674 | 32 |
| 19 | hsa-miR-299-5p   | -              | ugguuuaccguccacauacau   | mir-299 | --                                                                                                          | --       | 21 |
| 20 | hsa-miR-326      | -              | ccucugggcccuccuccag     | mir-326 | miRNAs that have been previously reported to be differentially expressed across stroke samples and subtypes | 19888324 | 51 |
| 21 | hsa-miR-30c-1-3p | hsa-miR-30c-1* | cugggagagguuuuuacucc    | mir-30  | miRNAs that have been previously reported to be differentially expressed across stroke samples and subtypes | 19888324 | 17 |
| 22 | mmu-miR-483-3p   | mmu-miR-483*   | ucacuccucccuccgucuu     | mir-483 | miRNAs in the same family of known stroke markers                                                           | 26096228 | 25 |

|    |                 |              |                        |         |                                                                                                             |          |    |
|----|-----------------|--------------|------------------------|---------|-------------------------------------------------------------------------------------------------------------|----------|----|
| 23 | hsa-miR-551b-3p | hsa-miR-551b | gcgacccauacuugguuucag  | mir-551 | miRNAs that have been previously reported to be differentially expressed across stroke samples and subtypes | 19888324 | 13 |
| 24 | hsa-miR-200b-3p | hsa-miR-200b | uauuacugccugguaaugauga | mir-8   | miRNAs that have been previously reported to be differentially expressed across stroke samples and subtypes | 25697638 | 32 |
| 25 | hsa-miR-874-3p  | hsa-miR-874  | cugcccuggcccaggaccga   | mir-874 | --                                                                                                          | --       | 28 |
| 26 | hsa-miR-124-3p  | hsa-miR-124  | uaaggcacgaggugaaugcc   | mir-124 | miRNAs that have been previously reported to be differentially expressed across stroke samples and subtypes | 26968104 | 37 |
| 27 | rno-miR-742-3p  | rno-miR-742  | gaaagccaccauguugguaaa  | mir-742 | --                                                                                                          | --       | 0  |
| 28 | mmu-miR-325-5p  | mmu-miR-325  | ccuaguaggucucaguaagugu | mir-325 | --                                                                                                          | --       | 12 |
| 29 | mmu-miR-329-3p  | mmu-miR-329  | aacacaccagcuaaccuuuuu  | mir-329 | --                                                                                                          | --       | 42 |
| 30 | hsa-let-7b-5p   | hsa-let-7b   | ugagguaguagguuguguguu  | let-7   | miRNAs that have been previously reported to be differentially expressed across stroke samples and subtypes | 19888324 | 35 |
| 31 | hsa-miR-22-3p   | hsa-miR-22   | aagcugccaguugaagaacugu | mir-22  | miRNAs involved in biological processes accompanied with or after stroke                                    | 26191152 | 39 |
| 32 | hsa-miR-128-3p  | hsa-miR-128  | ucacagugaaccggucucuuu  | mir-128 | --                                                                                                          | --       | 30 |
| 33 | hsa-let-7i-5p   | hsa-let-7i   | ugagguaguaguugugcuguu  | let-7   | miRNAs that have been previously reported to be                                                             | 19888324 | 30 |

|    |                 |              |                         |         |                                                                                                             |          |    |
|----|-----------------|--------------|-------------------------|---------|-------------------------------------------------------------------------------------------------------------|----------|----|
|    |                 |              |                         |         | differentially expressed across stroke samples and subtypes                                                 |          |    |
| 34 | hsa-miR-125b-5p | hsa-miR-125b | ucccugagaccuaacuuguga   | mir-10  | miRNAs that have been previously reported to be differentially expressed across stroke samples and subtypes | 24447930 | 30 |
| 35 | hsa-let-7a-5p   | hsa-let-7a   | ugagguaguagguuguauaguu  | let-7   | miRNAs that have been previously reported to be differentially expressed across stroke samples and subtypes | 19888324 | 28 |
| 36 | hsa-miR-138-5p  | hsa-miR-138  | agcugguguugaaucaggccg   | mir-138 | miRNAs involved in biological processes accompanied with or after stroke                                    | 22218763 | 25 |
| 37 | hsa-miR-134-5p  | hsa-miR-134  | ugugacugguugaccagagggg  | mir-134 | miRNAs that have been previously reported to be differentially expressed across stroke samples and subtypes | 25003713 | 32 |
| 38 | mmu-miR-322-5p  | mmu-miR-322  | cagcagcaauucauguuuugga  | mir-322 | --                                                                                                          | --       | 0  |
| 39 | mmu-miR-664-3p  | mmu-miR-664  | uauucauuuacucccagccua   | mir-664 | --                                                                                                          | --       | 27 |
| 40 | hsa-miR-103a-3p | hsa-miR-103  | agcagcauuguacagggcuauga | mir-103 | miRNAs that have been previously reported to be differentially expressed across stroke samples and subtypes | 19888324 | 40 |
| 41 | hsa-miR-107     | -            | agcagcauuguacagggcuauca | mir-103 | miRNAs that have been previously reported to be differentially expressed across                             | 19888324 | 40 |

|    |                 |               |                         |          |                                                                                                             |          |    |
|----|-----------------|---------------|-------------------------|----------|-------------------------------------------------------------------------------------------------------------|----------|----|
|    |                 |               |                         |          | stroke samples and subtypes                                                                                 |          |    |
| 42 | hsa-miR-28-5p   | -             | aaggagcucacagucuauugag  | mir-28   | --                                                                                                          | --       | 15 |
| 43 | hsa-miR-106b-3p | hsa-miR-106b* | ccgcacugugguacuugcugc   | mir-17   | miRNAs that have been previously reported to be differentially expressed across stroke samples and subtypes | 19888324 | 7  |
| 44 | hsa-miR-125a-3p | -             | acaggugagguucuugggagcc  | mir-10   | miRNAs that have been previously reported to be differentially expressed across stroke samples and subtypes | 27106952 | 37 |
| 45 | hsa-miR-144-3p  | hsa-miR-144   | uacaguauagaugauguacu    | mir-144  | miRNAs that have been previously reported to be differentially expressed across stroke samples and subtypes | 19888324 | 33 |
| 46 | mmu-miR-672-5p  | mmu-miR-672   | ugagguugguguacuguguguga | mir-672  | --                                                                                                          | --       | 12 |
| 47 | rno-miR-760-5p  | -             | ccccucaggccaccagagcccg  | mir-760  | --                                                                                                          | --       | 0  |
| 48 | hsa-miR-760     | -             | cggcucugggucugugggga    | mir-760  | --                                                                                                          | --       | 31 |
| 49 | mmu-miR-1224-5p | mmu-miR-1224  | gugaggacuggggagguggag   | mir-1224 | miRNAs that have been previously reported to be differentially expressed across stroke samples and subtypes | 22937209 | 20 |

**Table S3 Function chart of top 100 mRNAs**

| Category        | Term                                      | Count | P-Value | Genes Symbol                                                                                                                                                                                                                                                                                                                                                                                                                                             | Benja mini |
|-----------------|-------------------------------------------|-------|---------|----------------------------------------------------------------------------------------------------------------------------------------------------------------------------------------------------------------------------------------------------------------------------------------------------------------------------------------------------------------------------------------------------------------------------------------------------------|------------|
| GOTERM_BP_FAT   | GO:0048511~rhythmic process               | 7     | 0.0001  | JUN, HS3ST2, CCRN4L, CRY1, PGLYRP1, PER1, NFIL3                                                                                                                                                                                                                                                                                                                                                                                                          | 0.0704     |
| UP_TISSUE       | Brain                                     | 60    | 0.0001  | PITPNM1, CYP46A1, FXR2, PCSK2, IQSEC3, TYRO3, CREM, ZMYND8, GADD45B, GPR162, ARTN, CNKSR3, KIFC2, PLAT, DSCAM, TENM3, WDR91, INPP4A, PLEKHG3, HS3ST2, MAFK, TCF25, RIMBP2, NPAS4, MAP3K6, PLA1A, TOB2, GADD45G, PHRF1, ASPA, COQ10B, RASL11A, PFKP, ADRM1, MARCKSL1, PDE4B, COQ7, RTEL1, ALDH1A1, NUMB, PER1, ANXA11, RASSF5, RTN4RL2, SYT12, DUSP1, LIMK1, KCNH1, MAPK8IP1, FEM1B, AZIN1, SCG2, ADRA1B, CRY1, MARK1, CAMK2G, CAMKK1, CMIP, TLE3, SORBS2 | 0.0091     |
| SP_PIR_KEYWORDS | Biological rhythms                        | 4     | 0.0001  | CCRN4L, CRY1, PER1, NFIL3                                                                                                                                                                                                                                                                                                                                                                                                                                | 0.0247     |
| GOTERM_BP_FAT   | GO:0007623~circadian rhythm               | 5     | 0.0001  | JUN, HS3ST2, CRY1, PGLYRP1, PER1                                                                                                                                                                                                                                                                                                                                                                                                                         | 0.0515     |
| UP_SEQ_FEATURE  | Region of interest: Calmodulin-binding    | 5     | 0.0002  | STRN3, CAMK1G, CAMK2G, KCNH1, CAMKK1                                                                                                                                                                                                                                                                                                                                                                                                                     | 0.0753     |
| GOTERM_BP_FAT   | GO:0042752~regulation of circadian rhythm | 4     | 0.0002  | BHLHE40, PGLYRP1, PER1, CREM                                                                                                                                                                                                                                                                                                                                                                                                                             | 0.0554     |
| SP_PIR_KEYWORDS | Calmodulin-binding                        | 6     | 0.0004  | STRN3, CAMK1G, CAMK2G, KCNH1, CAMKK1, MARCKSL1                                                                                                                                                                                                                                                                                                                                                                                                           | 0.0339     |
| SP_PIR_KEYWORDS | Kinase                                    | 12    | 0.0008  | ZMYND8, LIMK1, CAMK1G, MARK1, CAMK2G, SIK1, GNE, CAMKK1, MAPK8IP1, TYRO3, PFKP, MAP3K6                                                                                                                                                                                                                                                                                                                                                                   | 0.0472     |
| GOTERM_MF_FAT   | GO:0005516~calmodulin binding             | 6     | 0.0011  | STRN3, CAMK1G, CAMK2G, KCNH1, CAMKK1, MARCKSL1                                                                                                                                                                                                                                                                                                                                                                                                           | 0.2543     |

|                 |                                                            |    |        |                                                                                                                                                                                                                                                                                                                                                                                              |        |
|-----------------|------------------------------------------------------------|----|--------|----------------------------------------------------------------------------------------------------------------------------------------------------------------------------------------------------------------------------------------------------------------------------------------------------------------------------------------------------------------------------------------------|--------|
| GOTERM_BP_FAT   | GO:0007243~protein kinase cascade                          | 9  | 0.0014 | GADD45B, NOTCH4, SCG2, ADRA1B, GADD45G, MARK1, SIK1, MAPK8IP1, MAP3K6                                                                                                                                                                                                                                                                                                                        | 0.2232 |
| UP_SEQ_FEATURE  | DNA-binding region:<br>Basic motif                         | 6  | 0.0015 | JUN, BHLHE40, MAFK, NFIL3, NPAS4, CREM                                                                                                                                                                                                                                                                                                                                                       | 0.2688 |
| GOTERM_BP_FAT   | GO:0006468~protein amino acid phosphorylation              | 12 | 0.0016 | GADD45B, LIMK1, CAMK1G, GADD45G, MARK1, CAMK2G, SIK1, CAMKK1, MAPK8IP1, LIPE, TYRO3, MAP3K6                                                                                                                                                                                                                                                                                                  | 0.2111 |
| SP_PIR_KEYWORDS | Phosphoprotein                                             | 53 | 0.0019 | JUN, PITPNM1, FXR2, NOTCH4, CAMK1G, IQSEC3, TYRO3, CREM, ZMYND8, CNKSR3, BAI1, INPP4A, WDR91, PLEKHG3, MAFK, TCF25, RIMBP2, MAP3K6, DMP1, TOB2, PHRF1, GNL3, PFKP, ADRM1, MARCKSL1, LENG1, CADM4, PDE4B, BHLHE40, NUMB, PER1, LIPE, ANXA11, RASSF5, LIMK1, NFIL3, LURAP1L, MAPK8IP1, PAK1IP1, SCG2, STRN3, ADRA1B, CRY1, MARK1, CAMK2G, GNE, SESN1, SIK1, CAMKK1, CMIP, TLE3, SORBS2, KCNK12 | 0.0815 |
| INTERPRO        | IPR004827:Basic-leucine zipper (bZIP) transcription factor | 4  | 0.0034 | JUN, MAFK, NFIL3, CREM                                                                                                                                                                                                                                                                                                                                                                       | 0.6080 |
| KEGG_PATHWAY    | hsa04710: Circadian rhythm                                 | 3  | 0.0038 | BHLHE40, CRY1, PER1                                                                                                                                                                                                                                                                                                                                                                          | 0.1930 |
| UP_SEQ_FEATURE  | Nucleotide phosphate-binding region:<br>ATP                | 13 | 0.0040 | CAMK1G, RTEL1, MARK1, CAMK2G, GNE, TYRO3, MAP3K6, LIMK1, CNKSR3, KIFC2, SIK1, CAMKK1, PFKP                                                                                                                                                                                                                                                                                                   | 0.4293 |
| SMART           | SM00338: BRLZ                                              | 4  | 0.0044 | JUN, MAFK, NFIL3, CREM                                                                                                                                                                                                                                                                                                                                                                       | 0.2493 |
| SP_PIR_KEYWORDS | Cytoplasm                                                  | 29 | 0.0045 | PITPNM1, FXR2, CAMK1G, ALDH1A1, GORAB, PER1, IQSEC3, LIPE, ANXA11, RASSF5, LIMK1, SMOX, CIRBP, MAPK8IP1,                                                                                                                                                                                                                                                                                     | 0.1487 |

|                 |                                                         |    |        |                                                                                                                          |        |
|-----------------|---------------------------------------------------------|----|--------|--------------------------------------------------------------------------------------------------------------------------|--------|
|                 |                                                         |    |        | FEM1B, TESC, STRN3, CRY1, MARK1, GNE, WASF1, DMP1, TOB2, ASPA, SIK1, CAMKK1, CMIP, ADRM1, SORBS2                         |        |
| GOTERM_MF_FAT   | GO:0004683~calmodulin-dependent protein kinase activity | 3  | 0.0055 | CAMK1G, CAMK2G, CAMKK1                                                                                                   | 0.5136 |
| GOTERM_BP_FAT   | GO:0007242~intracellular signaling cascade              | 16 | 0.0056 | KLF9, PMEPA1, NOTCH4, SCG2, ADRA1B, MARK1, MAP3K6, RASSF5, CREM, DUSP1, GADD45B, LIMK1, GADD45G, RASL11A, SIK1, MAPK8IP1 | 0.4898 |
| GOTERM_BP_FAT   | GO:0016310~phosphorylation                              | 12 | 0.0066 | GADD45B, LIMK1, CAMK1G, GADD45G, MARK1, CAMK2G, SIK1, CAMKK1, MAPK8IP1, LIPE, TYRO3, MAP3K6                              | 0.4937 |
| UP_SEQ_FEATURE  | Domain: PAC                                             | 3  | 0.0080 | KCNH1, PER1, NPAS4                                                                                                       | 0.5636 |
| GOTERM_BP_FAT   | GO:0006793~phosphorus metabolic process                 | 13 | 0.0105 | DUSP1, GADD45B, LIMK1, CAMK1G, GADD45G, MARK1, CAMK2G, SIK1, CAMKK1, MAPK8IP1, LIPE, TYRO3, MAP3K6                       | 0.6137 |
| GOTERM_BP_FAT   | GO:0006796~phosphate metabolic process                  | 13 | 0.0105 | DUSP1, GADD45B, LIMK1, CAMK1G, GADD45G, MARK1, CAMK2G, SIK1, CAMKK1, MAPK8IP1, LIPE, TYRO3, MAP3K6                       | 0.6137 |
| UP_SEQ_FEATURE  | Domain: Protein kinase                                  | 8  | 0.0110 | LIMK1, CAMK1G, MARK1, CAMK2G, SIK1, CAMKK1, TYRO3, MAP3K6                                                                | 0.6009 |
| KEGG_PATHWAY    | hsa04115: p53 signaling pathway                         | 4  | 0.0128 | GADD45B, GADD45G, BAI1, SESN1                                                                                            | 0.3038 |
| UP_SEQ_FEATURE  | Compositionally biased region: Poly-Arg                 | 5  | 0.0130 | GRIK5, FXR2, NOTCH4, CNKSR3, ADRA1B                                                                                      | 0.5964 |
| SP_PIR_KEYWORDS | Serine/threonine-protein kinase                         | 7  | 0.0139 | LIMK1, CAMK1G, MARK1, CAMK2G, SIK1, CAMKK1, MAP3K6                                                                       | 0.3387 |
| INTERPRO        | IPR000014: PAS                                          | 3  | 0.0151 | KCNH1, PER1, NPAS4                                                                                                       | 0.8755 |
| INTERPRO        | IPR017441: Protein kinase, ATP binding site             | 8  | 0.0152 | LIMK1, CAMK1G, MARK1, CAMK2G, SIK1, CAMKK1, TYRO3, MAP3K6                                                                | 0.7530 |



|                 |                                                                    |   |        |                                                                   |        |
|-----------------|--------------------------------------------------------------------|---|--------|-------------------------------------------------------------------|--------|
| INTERPRO        | IPR008271: Serine/threonine protein kinase, active site            | 7 | 0.0158 | LIMK1, CAMK1G, MARK1, CAMK2G, SIK1, CAMKK1, MAP3K6                | 0.6622 |
| INTERPRO        | IPR002290: Serine/threonine protein kinase                         | 6 | 0.0163 | CAMK1G, MARK1, CAMK2G, SIK1, CAMKK1, MAP3K6                       | 0.5926 |
| INTERPRO        | IPR017442: Serine/threonine protein kinase-related                 | 7 | 0.0168 | LIMK1, CAMK1G, MARK1, CAMK2G, SIK1, CAMKK1, MAP3K6                | 0.5372 |
| SP_PIR_KEYWORDS | Allosteric enzyme                                                  | 3 | 0.0172 | CAMK1G, GNE, PFKP                                                 | 0.3546 |
| GOTERM_BP_FAT   | GO:0033554~cellular response to stress                             | 9 | 0.0172 | JUN, BTG2, GADD45G, RTEL1, CRY1, SESN1, MAPK8IP1, MAP3K6, RTN4RL2 | 0.7527 |
| PIR_SUPERFAMILY | PIRSF010369: growth arrest and DNA-damage-inducible protein GADD45 | 2 | 0.0177 | GADD45B, GADD45G                                                  | 0.6704 |
| SMART           | SM00091: PAS                                                       | 3 | 0.0181 | KCNH1, PER1, NPAS4                                                | 0.4468 |
| GOTERM_BP_FAT   | GO:0008285~negative regulation of cell proliferation               | 7 | 0.0188 | TESC, JUN, TOB2, SCG2, BTG2, BAI1, SESN1                          | 0.7474 |
| INTERPRO        | IPR000719: Protein kinase, core                                    | 8 | 0.0190 | LIMK1, CAMK1G, MARK1, CAMK2G, SIK1, CAMKK1, TYRO3, MAP3K6         | 0.5276 |
| UP_SEQ_FEATURE  | Domain: Leucine-zipper                                             | 4 | 0.0195 | JUN, MAFK, NFIL3, CREM                                            | 0.6892 |
| GOTERM_MF_FAT   | GO:0004672~protein kinase activity                                 | 9 | 0.0201 | LIMK1, CAMK1G, MARK1, CAMK2G, KCNH1, SIK1, CAMKK1, TYRO3, MAP3K6  | 0.8263 |
| UP_SEQ_FEATURE  | Active site: Proton acceptor                                       | 9 | 0.0209 | CAMK1G, ALDH1A1, MARK1, CAMK2G, SIK1, CAMKK1, TYRO3, PFKP, MAP3K6 | 0.6655 |

|                 |                                                                       |    |        |                                                                                                                 |        |
|-----------------|-----------------------------------------------------------------------|----|--------|-----------------------------------------------------------------------------------------------------------------|--------|
| UP_SEQ_FEATURE  | Binding site: ATP                                                     | 8  | 0.0225 | LIMK1, CAMK1G, MARK1, CAMK2G, SIK1, CAMKK1, TYRO3, MAP3K6                                                       | 0.6503 |
| GOTERM_BP_FAT   | GO:0000165~MAPKKK cascade                                             | 5  | 0.0226 | GADD45B, SCG2, GADD45G, MAPK8IP1, MAP3K6                                                                        | 0.7777 |
| SMART           | SM00220:S_TKc                                                         | 6  | 0.0228 | CAMK1G, MARK1, CAMK2G, SIK1, CAMKK1, MAP3K6                                                                     | 0.3932 |
| SP_PIR_KEYWORDS | Repressor                                                             | 7  | 0.0249 | CRY1, MAFK, CIRBP, TCF25, NFIL3, TLE3, CREM                                                                     | 0.4276 |
| SP_PIR_KEYWORDS | Nucleotide-binding                                                    | 16 | 0.0254 | CAMK1G, RTEL1, CRY1, MARK1, CAMK2G, GNE, TYRO3, MAP3K6, LIMK1, CNKSR3, KIFC2, RASL11A, SIK1, CAMKK1, GNL3, PFKP | 0.3965 |
| GOTERM_CC_FAT   | GO:0005954 ~ calcium- and calmodulin dependent protein kinase complex | 2  | 0.0259 | CAMK1G, CAMK2G                                                                                                  | 0.9773 |
| GOTERM_BP_FAT   | GO:0000185~activation of MAPKKK activity                              | 2  | 0.0289 | GADD45B, GADD45G                                                                                                | 0.8292 |
| UP_SEQ_FEATURE  | Region of interest: Autoinhibitory domain                             | 2  | 0.0307 | CAMK1G, CAMKK1                                                                                                  | 0.7256 |
| UP_SEQ_FEATURE  | Repeat:WD 5                                                           | 5  | 0.0330 | CORO6, STRN3, WDR91, TLE3, PAK1IP1                                                                              | 0.7181 |
| GOTERM_MF_FAT   | GO:0004674~protein serine/threonine kinase activity                   | 7  | 0.0337 | LIMK1, CAMK1G, MARK1, CAMK2G, SIK1, CAMKK1, MAP3K6                                                              | 0.8912 |
| GOTERM_BP_FAT   | GO:0009649~entrainment of circadian clock                             | 2  | 0.0345 | BHLHE40, PER1                                                                                                   | 0.8588 |
| GOTERM_BP_FAT   | GO:0048514~blood vessel morphogenesis                                 | 5  | 0.0349 | JUN, NOTCH4, SCG2, ADRA1B, PLAT                                                                                 | 0.8407 |
| INTERPRO        | IPR002087:Anti-proliferative protein                                  | 2  | 0.0392 | TOB2, BTG2                                                                                                      | 0.7450 |

|                                |                                             |    |        |                                                                                                                                                                                                                                                                                                                                                         |        |
|--------------------------------|---------------------------------------------|----|--------|---------------------------------------------------------------------------------------------------------------------------------------------------------------------------------------------------------------------------------------------------------------------------------------------------------------------------------------------------------|--------|
| GOTERM_BP_FAT                  | GO:0042127~regulation of cell proliferation | 10 | 0.0394 | TESC, JUN, TOB2, NOTCH4, SCG2, BTG2, BAI1, SESN1, GNL3, MARCKSL1                                                                                                                                                                                                                                                                                        | 0.8563 |
| SP_PIR_KEYWORDS                | ATP-binding                                 | 13 | 0.0395 | CAMK1G, RTEL1, MARK1, CAMK2G, GNE, TYRO3, MAP3K6, LIMK1, CNKSR3, KIFC2, SIK1, CAMKK1, PFKP                                                                                                                                                                                                                                                              | 0.5097 |
| INTERPRO                       | IPR019782: WD40 repeat 2                    | 5  | 0.0404 | CORO6, STRN3, WDR91, TLE3, PAK1IP1                                                                                                                                                                                                                                                                                                                      | 0.7134 |
| UP_SEQ_FEATURE                 | Repeat: WD 4                                | 5  | 0.0415 | CORO6, STRN3, WDR91, TLE3, PAK1IP1                                                                                                                                                                                                                                                                                                                      | 0.7695 |
| KEGG_PATHWAY                   | hsa04010:MAPK signaling pathway             | 6  | 0.0423 | DUSP1, JUN, GADD45B, GADD45G, MAPK8IP1, MAP3K6                                                                                                                                                                                                                                                                                                          | 0.5539 |
| SMART                          | SM00099: btg1                               | 2  | 0.0431 | TOB2, BTG2                                                                                                                                                                                                                                                                                                                                              | 0.5116 |
| UP_TISSUE                      | Fetal lung                                  | 3  | 0.0453 | RTEL1, PLAT, SIK1                                                                                                                                                                                                                                                                                                                                       | 0.8473 |
| SP_PIR_KEYWORDS                | Apoptosis                                   | 6  | 0.0470 | MRPL41, GADD45B, GADD45G, RTEL1, RASSF5, FEM1B                                                                                                                                                                                                                                                                                                          | 0.5390 |
| INTERPRO                       | IPR017986: WD40 repeat, region              | 5  | 0.0473 | CORO6, STRN3, WDR91, TLE3, PAK1IP1                                                                                                                                                                                                                                                                                                                      | 0.7332 |
| GENETIC_ASSOCIATION_DB_DISEASE | Alzheimer's Disease                         | 5  | 0.0480 | CYP46A1, NOTCH4, CAMK2G, PLAT, MAPK8IP1                                                                                                                                                                                                                                                                                                                 | 0.9503 |
| UP_SEQ_FEATURE                 | Repeat: WD 3                                | 5  | 0.0490 | CORO6, STRN3, WDR91, TLE3, PAK1IP1                                                                                                                                                                                                                                                                                                                      | 0.7988 |
| INTERPRO                       | IPR019781: WD40 repeat, subgroup            | 5  | 0.0497 | CORO6, STRN3, WDR91, TLE3, PAK1IP1                                                                                                                                                                                                                                                                                                                      | 0.7177 |
| SP_PIR_KEYWORDS                | Alternative splicing                        | 48 | 0.0510 | PDE4B, PITPNM1, NOTCH4, CAMK1G, RTEL1, GORAB, PER1, NUMB, IQSEC3, LIPE, RASSF5, CREM, GPR162, ZMYND8, LIMK1, CNKSR3, ARTN, SMOX, KCNH1, PLAT, DSCAM, WDR91, INPP4A, UPP1, TTC22, PLEKHG3, BEND5, GRIK5, TESC, CORO6, PMEPA1, STRN3, MARK1, CAMK2G, SESN1, RIMBP2, CHPF2, MAP3K6, DMP1, PLA1A, SEC61A2, PHRF1, SLC35F4, CAMKK1, CMIP, GNL3, TLE3, SORBS2 | 0.5383 |

|                 |                                                           |    |        |                                                                                           |        |
|-----------------|-----------------------------------------------------------|----|--------|-------------------------------------------------------------------------------------------|--------|
| SP_PIR_KEYWORDS | Transferase                                               | 13 | 0.0541 | LIMK1, HS3ST2, CAMK1G, MARK1, CAMK2G, SIK1, GNE, CAMKK1, UPP1, TYRO3, PFKP, CHPF2, MAP3K6 | 0.5311 |
| UP_SEQ_FEATURE  | Repeat: WD 1                                              | 5  | 0.0541 | CORO6, STRN3, WDR91, TLE3, PAK1IP1                                                        | 0.8079 |
| UP_SEQ_FEATURE  | Repeat: WD 2                                              | 5  | 0.0541 | CORO6, STRN3, WDR91, TLE3, PAK1IP1                                                        | 0.8079 |
| SP_PIR_KEYWORDS | WD repeat                                                 | 5  | 0.0543 | CORO6, STRN3, WDR91, TLE3, PAK1IP1                                                        | 0.5062 |
| GOTERM_BP_FAT   | GO:0000904~cell morphogenesis involved in differentiation | 5  | 0.0544 | NOTCH4, NUMB, DSCAM, BAI1, RTN4RL2                                                        | 0.9203 |
| GOTERM_BP_FAT   | GO:0001568~blood vessel development                       | 5  | 0.0550 | JUN, NOTCH4, SCG2, ADRA1B, PLAT                                                           | 0.9103 |
| UP_SEQ_FEATURE  | Compositionally biased region: Gly/Pro-rich               | 2  | 0.0555 | TLE3, CHPF2                                                                               | 0.7942 |
| GOTERM_BP_FAT   | GO:0001944~vasculature development                        | 5  | 0.0591 | JUN, NOTCH4, SCG2, ADRA1B, PLAT                                                           | 0.9138 |
| INTERPRO        | IPR004038: Ribosomal protein L7Ae/L30e/S12e/Gadd45        | 2  | 0.0610 | GADD45B, GADD45G                                                                          | 0.7611 |
| GOTERM_BP_FAT   | GO:0006595~polyamine metabolic process                    | 2  | 0.0624 | AZIN1, SMOX                                                                               | 0.9142 |
| GOTERM_BP_FAT   | GO:0045637~regulation of myeloid cell differentiation     | 3  | 0.0630 | TESC, JUN, TOB2                                                                           | 0.9053 |
| GOTERM_BP_FAT   | GO:0009628~response to abiotic stimulus                   | 6  | 0.0639 | DUSP1, JUN, PITPNM1, ADRA1B, BTG2, CIRBP                                                  | 0.8973 |
| INTERPRO        | IPR001680:WD40 repeat                                     | 5  | 0.0657 | CORO6, STRN3, WDR91, TLE3, PAK1IP1                                                        | 0.7601 |
| GOTERM_BP_FAT   | GO:0030522~intracellular                                  | 3  | 0.0711 | KLF9, PMEPA1, CREM                                                                        | 0.9117 |

|                 |                                                                                     |    |        |                                                                                                                                                                                                                                                                                                                                                   |        |
|-----------------|-------------------------------------------------------------------------------------|----|--------|---------------------------------------------------------------------------------------------------------------------------------------------------------------------------------------------------------------------------------------------------------------------------------------------------------------------------------------------------|--------|
|                 | receptor-mediated signaling pathway                                                 |    |        |                                                                                                                                                                                                                                                                                                                                                   |        |
| BIOCARTA        | h_dreampathway: Repression of Pain Sensation by the Transcriptional Regulator DREAM | 2  | 0.0729 | JUN, CREM                                                                                                                                                                                                                                                                                                                                         | 0.9901 |
| INTERPRO        | IPR019775: WD40 repeat, conserved site                                              | 5  | 0.0739 | CORO6, STRN3, WDR91, TLE3, PAK1IP1                                                                                                                                                                                                                                                                                                                | 0.7760 |
| UP_SEQ_FEATURE  | Splice variant                                                                      | 47 | 0.0788 | PDE4B, PITPNM1, NOTCH4, CAMK1G, RTEL1, GORAB, NUMB, IQSEC3, LIPE, RASSF5, CREM, GPR162, ZMYND8, LIMK1, CNKSR3, ARTN, SMOX, KCNH1, PLAT, DSCAM, WDR91, INPP4A, UPP1, TTC22, PLEKHG3, BEND5, GRIK5, TESC, CORO6, PMEPA1, STRN3, MARK1, CAMK2G, SESN1, RIMBP2, CHPF2, MAP3K6, DMP1, PLA1A, SEC61A2, PHRF1, SLC35F4, CAMKK1, CMIP, GNL3, TLE3, SORBS2 | 0.8812 |
| GOTERM_BP_FAT   | GO:0051094~positive regulation of developmental process                             | 5  | 0.0795 | TESC, JUN, LIMK1, TOB2, NUMB                                                                                                                                                                                                                                                                                                                      | 0.9263 |
| GOTERM_CC_FAT   | GO:0005625~soluble fraction                                                         | 5  | 0.0816 | PDE4B, PCSK2, RTEL1, CRHBP, PFKP                                                                                                                                                                                                                                                                                                                  | 0.9978 |
| SP_PIR_KEYWORDS | Ubl conjugation                                                                     | 7  | 0.0829 | BHLHE40, NUMB, PER1, RIMBP2, MAPK8IP1, ADRM1, SORBS2                                                                                                                                                                                                                                                                                              | 0.6399 |
| GOTERM_MF_FAT   | GO:0046983~protein dimerization activity                                            | 7  | 0.0839 | JUN, LIMK1, NOTCH4, MAFK, NFIL3, NPAS4, CREM                                                                                                                                                                                                                                                                                                      | 0.9893 |
| SMART           | SM00320: WD40                                                                       | 5  | 0.0852 | CORO6, STRN3, WDR91, TLE3, PAK1IP1                                                                                                                                                                                                                                                                                                                | 0.6859 |
| GOTERM_BP_FAT   | GO:0006355~regulation                                                               | 16 | 0.0873 | TESC, JUN, KLF9, STRN3, NOTCH4, BHLHE40, MAFK, PER1,                                                                                                                                                                                                                                                                                              | 0.9365 |

|                                      |                                                                 |   |        |                                                        |        |
|--------------------------------------|-----------------------------------------------------------------|---|--------|--------------------------------------------------------|--------|
|                                      | of transcription,<br>DNA-dependent                              |   |        | TCF25, NPAS4, CREM, KCNH1, SIK1, NFIL3, MAPK8IP1, TLE3 |        |
| GOTERM_BP_FAT                        | GO:0007405~neuroblast<br>proliferation                          | 2 | 0.0895 | ARTN, NUMB                                             | 0.9338 |
| GOTERM_BP_FAT                        | GO:0006469~negative<br>regulation of protein<br>kinase activity | 3 | 0.0917 | GADD45B, GADD45G, MAPK8IP1                             | 0.9314 |
| INTERPRO                             | IPR015943:<br>WD40/YVTN repeat-like                             | 5 | 0.0925 | CORO6, STRN3, WDR91, TLE3, PAK1IP1                     | 0.8290 |
| GENETIC_ASSOCIATION_DB_DISEASE_CLASS | PSYCH                                                           | 7 | 0.0936 | PDE4B, GRIK5, NOTCH4, PLAT, PER1, CRHBP, CREM          | 0.6608 |
| UP_SEQ_FEATURE                       | Domain: PAS 1                                                   | 2 | 0.0940 | PER1, NPAS4                                            | 0.9102 |
| UP_SEQ_FEATURE                       | Domain: SH3 3                                                   | 2 | 0.0940 | RIMBP2, SORBS2                                         | 0.9102 |
| UP_SEQ_FEATURE                       | Domain: PAS 2                                                   | 2 | 0.0940 | PER1, NPAS4                                            | 0.9102 |
| GOTERM_BP_FAT                        | GO:0033673~negative<br>regulation of kinase<br>activity         | 3 | 0.0971 | GADD45B, GADD45G, MAPK8IP1                             | 0.9354 |
| INTERPRO                             | IPR013655: PAS fold-3                                           | 2 | 0.0979 | PER1, NPAS4                                            | 0.8275 |

**Table S4 Function cluster of top 100 mRNAs**

| <b>Annotation Cluster 1</b>                 |                                               |              |                |                                                                                             |                  |
|---------------------------------------------|-----------------------------------------------|--------------|----------------|---------------------------------------------------------------------------------------------|------------------|
| <b>Enrichment Score: 1.8874016802736022</b> |                                               |              |                |                                                                                             |                  |
| <b>Category</b>                             | <b>Term</b>                                   | <b>Count</b> | <b>P-Value</b> | <b>Genes</b>                                                                                | <b>Benjamini</b> |
| UP_SEQ_FEATURE                              | Domain: PAC                                   | 3            | 0.0080         | KCNH1, PER1, NPAS4                                                                          | 0.5636           |
| INTERPRO                                    | IPR000014: PAS                                | 3            | 0.0151         | KCNH1, PER1, NPAS4                                                                          | 0.8755           |
| SMART                                       | SM00091: PAS                                  | 3            | 0.0181         | KCNH1, PER1, NPAS4                                                                          | 0.4468           |
| <b>Annotation Cluster 2</b>                 |                                               |              |                |                                                                                             |                  |
| <b>Enrichment Score: 1.6684704277730393</b> |                                               |              |                |                                                                                             |                  |
| <b>Category</b>                             | <b>Term</b>                                   | <b>Count</b> | <b>P-Value</b> | <b>Genes</b>                                                                                | <b>Benjamini</b> |
| UP_SEQ_FEATURE                              | Region of interest:<br>Calmodulin-binding     | 5            | 0.0002         | STRN3, CAMK1G, CAMK2G, KCNH1, CAMKK1                                                        | 0.0753           |
| SP_PIR_KEYWORDS                             | Calmodulin-binding                            | 6            | 0.0004         | STRN3, CAMK1G, CAMK2G, KCNH1, CAMKK1, MARCKSL1                                              | 0.0339           |
| SP_PIR_KEYWORDS                             | Kinase                                        | 12           | 0.0008         | ZMYND8, LIMK1, CAMK1G, MARK1, CAMK2G, SIK1, GNE, CAMKK1, MAPK8IP1, TYRO3, PFKP, MAP3K6      | 0.0472           |
| GOTERM_MF_FAT                               | GO:0005516~calmodulin binding                 | 6            | 0.0011         | STRN3, CAMK1G, CAMK2G, KCNH1, CAMKK1, MARCKSL1                                              | 0.2543           |
| GOTERM_BP_FAT                               | GO:0006468~protein amino acid phosphorylation | 12           | 0.0016         | GADD45B, LIMK1, CAMK1G, GADD45G, MARK1, CAMK2G, SIK1, CAMKK1, MAPK8IP1, LIPE, TYRO3, MAP3K6 | 0.2111           |
| UP_SEQ_FEATURE                              | Nucleotide phosphate-binding region: ATP      | 13           | 0.0040         | CAMK1G, RTEL1, MARK1, CAMK2G, GNE, TYRO3, MAP3K6, LIMK1, CNKSR3, KIFC2, SIK1, CAMKK1, PFKP  | 0.4293           |
| GOTERM_MF_FAT                               | GO:0004683~calmodulin-depend                  | 3            | 0.0055         | CAMK1G, CAMK2G, CAMKK1                                                                      | 0.5136           |

|                 |                                                         |    |        |                                                                                                    |        |
|-----------------|---------------------------------------------------------|----|--------|----------------------------------------------------------------------------------------------------|--------|
|                 | ent protein kinase activity                             |    |        |                                                                                                    |        |
| GOTERM_BP_FAT   | GO:0016310~phosphorylation                              | 12 | 0.0066 | GADD45B, LIMK1, CAMK1G, GADD45G, MARK1, CAMK2G, SIK1, CAMKK1, MAPK8IP1, LIPE, TYRO3, MAP3K6        | 0.4937 |
| GOTERM_BP_FAT   | GO:0006793~phosphorus metabolic process                 | 13 | 0.0105 | DUSP1, GADD45B, LIMK1, CAMK1G, GADD45G, MARK1, CAMK2G, SIK1, CAMKK1, MAPK8IP1, LIPE, TYRO3, MAP3K6 | 0.6137 |
| GOTERM_BP_FAT   | GO:0006796~phosphate metabolic process                  | 13 | 0.0105 | DUSP1, GADD45B, LIMK1, CAMK1G, GADD45G, MARK1, CAMK2G, SIK1, CAMKK1, MAPK8IP1, LIPE, TYRO3, MAP3K6 | 0.6137 |
| UP_SEQ_FEATURE  | Domain: Protein kinase                                  | 8  | 0.0110 | LIMK1, CAMK1G, MARK1, CAMK2G, SIK1, CAMKK1, TYRO3, MAP3K6                                          | 0.6009 |
| SP_PIR_KEYWORDS | Serine/threonine-protein kinase                         | 7  | 0.0139 | LIMK1, CAMK1G, MARK1, CAMK2G, SIK1, CAMKK1, MAP3K6                                                 | 0.3387 |
| INTERPRO        | IPR017441: Protein kinase, ATP binding site             | 8  | 0.0152 | LIMK1, CAMK1G, MARK1, CAMK2G, SIK1, CAMKK1, TYRO3, MAP3K6                                          | 0.7530 |
| INTERPRO        | IPR008271: Serine/threonine protein kinase, active site | 7  | 0.0158 | LIMK1, CAMK1G, MARK1, CAMK2G, SIK1, CAMKK1, MAP3K6                                                 | 0.6622 |
| INTERPRO        | IPR002290: Serine/threonine protein kinase              | 6  | 0.0163 | CAMK1G, MARK1, CAMK2G, SIK1, CAMKK1, MAP3K6                                                        | 0.5926 |
| INTERPRO        | IPR017442: Serine/threonine protein kinase-related      | 7  | 0.0168 | LIMK1, CAMK1G, MARK1, CAMK2G, SIK1, CAMKK1, MAP3K6                                                 | 0.5372 |
| INTERPRO        | IPR000719: Protein kinase, core                         | 8  | 0.0190 | LIMK1, CAMK1G, MARK1, CAMK2G, SIK1, CAMKK1, TYRO3, MAP3K6                                          | 0.5276 |
| GOTERM_MF_FAT   | GO:0004672~protein kinase activity                      | 9  | 0.0201 | LIMK1, CAMK1G, MARK1, CAMK2G, KCNH1, SIK1, CAMKK1, TYRO3, MAP3K6                                   | 0.8263 |



|                 |                                                     |    |        |                                                                                                                 |        |
|-----------------|-----------------------------------------------------|----|--------|-----------------------------------------------------------------------------------------------------------------|--------|
| UP_SEQ_FEATURE  | Active site: Proton acceptor                        | 9  | 0.0209 | CAMK1G, ALDH1A1, MARK1, CAMK2G, SIK1, CAMKK1, TYRO3, PFKP, MAP3K6                                               | 0.6655 |
| UP_SEQ_FEATURE  | Binding site: ATP                                   | 8  | 0.0225 | LIMK1, CAMK1G, MARK1, CAMK2G, SIK1, CAMKK1, TYRO3, MAP3K6                                                       | 0.6503 |
| SMART           | SM00220:S_TKc                                       | 6  | 0.0228 | CAMK1G, MARK1, CAMK2G, SIK1, CAMKK1, MAP3K6                                                                     | 0.3932 |
| SP_PIR_KEYWORDS | Nucleotide-binding                                  | 16 | 0.0254 | CAMK1G, RTEL1, CRY1, MARK1, CAMK2G, GNE, TYRO3, MAP3K6, LIMK1, CNKSR3, KIFC2, RASL11A, SIK1, CAMKK1, GNL3, PFKP | 0.3965 |
| GOTERM_MF_FAT   | GO:0004674~protein serine/threonine kinase activity | 7  | 0.0337 | LIMK1, CAMK1G, MARK1, CAMK2G, SIK1, CAMKK1, MAP3K6                                                              | 0.8912 |
| SP_PIR_KEYWORDS | ATP-binding                                         | 13 | 0.0395 | CAMK1G, RTEL1, MARK1, CAMK2G, GNE, TYRO3, MAP3K6, LIMK1, CNKSR3, KIFC2, SIK1, CAMKK1, PFKP                      | 0.5097 |
| SP_PIR_KEYWORDS | Transferase                                         | 13 | 0.0541 | LIMK1, HS3ST2, CAMK1G, MARK1, CAMK2G, SIK1, GNE, CAMKK1, UPP1, TYRO3, PFKP, CHPF2, MAP3K6                       | 0.5311 |
| GOTERM_MF_FAT   | GO:0005524~ATP binding                              | 13 | 0.1213 | CAMK1G, RTEL1, MARK1, CAMK2G, GNE, TYRO3, MAP3K6, LIMK1, CNKSR3, KIFC2, SIK1, CAMKK1, PFKP                      | 0.9962 |
| GOTERM_MF_FAT   | GO:0032559~adenyl ribonucleotide binding            | 13 | 0.1303 | CAMK1G, RTEL1, MARK1, CAMK2G, GNE, TYRO3, MAP3K6, LIMK1, CNKSR3, KIFC2, SIK1, CAMKK1, PFKP                      | 0.9943 |
| GOTERM_MF_FAT   | GO:0032555~purine ribonucleotide binding            | 15 | 0.1429 | CAMK1G, RTEL1, MARK1, CAMK2G, GNE, TYRO3, MAP3K6, LIMK1, CNKSR3, KIFC2, SIK1, RASL11A, CAMKK1, GNL3, PFKP       | 0.9932 |
| GOTERM_MF_FAT   | GO:0032553~ribonucleotide                           | 15 | 0.1429 | CAMK1G, RTEL1, MARK1, CAMK2G, GNE, TYRO3,                                                                       | 0.9932 |

|                                             |                                      |              |                |                                                                                                                        |                  |
|---------------------------------------------|--------------------------------------|--------------|----------------|------------------------------------------------------------------------------------------------------------------------|------------------|
|                                             | binding                              |              |                | MAP3K6, LIMK1, CNKSR3, KIFC2, SIK1, RASL11A, CAMKK1, GNL3, PFKP                                                        |                  |
| GOTERM_MF_FAT                               | GO:0030554~adenyl nucleotide binding | 13           | 0.1703         | CAMK1G, RTEL1, MARK1, CAMK2G, GNE, TYRO3, MAP3K6, LIMK1, CNKSR3, KIFC2, SIK1, CAMKK1, PFKP                             | 0.9954           |
| GOTERM_MF_FAT                               | GO:0017076~purine nucleotide binding | 15           | 0.1822         | CAMK1G, RTEL1, MARK1, CAMK2G, GNE, TYRO3, MAP3K6, LIMK1, CNKSR3, KIFC2, SIK1, RASL11A, CAMKK1, GNL3, PFKP              | 0.9912           |
| GOTERM_MF_FAT                               | GO:0001883~purine nucleoside binding | 13           | 0.1834         | CAMK1G, RTEL1, MARK1, CAMK2G, GNE, TYRO3, MAP3K6, LIMK1, CNKSR3, KIFC2, SIK1, CAMKK1, PFKP                             | 0.9874           |
| GOTERM_MF_FAT                               | GO:0000166~nucleotide binding        | 17           | 0.1839         | CAMK1G, RTEL1, CRY1, MARK1, CAMK2G, GNE, TYRO3, MAP3K6, LIMK1, CNKSR3, KIFC2, CIRBP, RASL11A, SIK1, CAMKK1, GNL3, PFKP | 0.9826           |
| GOTERM_MF_FAT                               | GO:0001882~nucleoside binding        | 13           | 0.1896         | CAMK1G, RTEL1, MARK1, CAMK2G, GNE, TYRO3, MAP3K6, LIMK1, CNKSR3, KIFC2, SIK1, CAMKK1, PFKP                             | 0.9795           |
| GOTERM_MF_FAT                               | GO:0000287~magnesium ion binding     | 5            | 0.2492         | TESC, MARK1, SIK1, PFKP, MAP3K6                                                                                        | 0.9903           |
| SP_PIR_KEYWORDS                             | magnesium                            | 4            | 0.3983         | MARK1, SIK1, PFKP, MAP3K6                                                                                              | 0.9550           |
| <b>Annotation Cluster 3</b>                 |                                      |              |                |                                                                                                                        |                  |
| <b>Enrichment Score: 1.2138199962269758</b> |                                      |              |                |                                                                                                                        |                  |
| <b>Category</b>                             | <b>Term</b>                          | <b>Count</b> | <b>P-Value</b> | <b>Genes</b>                                                                                                           | <b>Benjamini</b> |
| UP_SEQ_FEATURE                              | Repeat: WD 5                         | 5            | 0.0330         | CORO6, STRN3, WDR91, TLE3, PAK1IP1                                                                                     | 0.7516           |
| INTERPRO                                    | IPR019782: WD40 repeat 2             | 5            | 0.0404         | CORO6, STRN3, WDR91, TLE3, PAK1IP1                                                                                     | 0.7548           |
| UP_SEQ_FEATURE                              | Repeat: WD 4                         | 5            | 0.0415         | CORO6, STRN3, WDR91, TLE3, PAK1IP1                                                                                     | 0.7983           |

| INTERPRO                                    | IPR017986: WD40 repeat, region         | 5     | 0.0473  | CORO6, STRN3, WDR91, TLE3, PAK1IP1                                    | 0.7697    |
|---------------------------------------------|----------------------------------------|-------|---------|-----------------------------------------------------------------------|-----------|
| UP_SEQ_FEATURE                              | Repeat: WD 3                           | 5     | 0.0490  | CORO6, STRN3, WDR91, TLE3, PAK1IP1                                    | 0.8239    |
| INTERPRO                                    | IPR019781: WD40 repeat, subgroup       | 5     | 0.0497  | CORO6, STRN3, WDR91, TLE3, PAK1IP1                                    | 0.7512    |
| UP_SEQ_FEATURE                              | Repeat: WD 2                           | 5     | 0.0541  | CORO6, STRN3, WDR91, TLE3, PAK1IP1                                    | 0.8308    |
| UP_SEQ_FEATURE                              | Repeat: WD 1                           | 5     | 0.0541  | CORO6, STRN3, WDR91, TLE3, PAK1IP1                                    | 0.8308    |
| SP_PIR_KEYWORDS                             | WD repeat                              | 5     | 0.0543  | CORO6, STRN3, WDR91, TLE3, PAK1IP1                                    | 0.5062    |
| INTERPRO                                    | IPR001680: WD40 repeat                 | 5     | 0.0657  | CORO6, STRN3, WDR91, TLE3, PAK1IP1                                    | 0.8149    |
| INTERPRO                                    | IPR019775: WD40 repeat, conserved site | 5     | 0.0739  | CORO6, STRN3, WDR91, TLE3, PAK1IP1                                    | 0.8255    |
| SMART                                       | SM00320: WD40                          | 5     | 0.0852  | CORO6, STRN3, WDR91, TLE3, PAK1IP1                                    | 0.7648    |
| INTERPRO                                    | IPR015943: WD40/YVTN repeat-like       | 5     | 0.0925  | CORO6, STRN3, WDR91, TLE3, PAK1IP1                                    | 0.8697    |
| UP_SEQ_FEATURE                              | Repeat: WD 6                           | 3     | 0.2622  | STRN3, WDR91, TLE3                                                    | 0.9922    |
| <b>Annotation Cluster 4</b>                 |                                        |       |         |                                                                       |           |
| <b>Enrichment Score: 1.1180821627432336</b> |                                        |       |         |                                                                       |           |
| Category                                    | Term                                   | Count | P-Value | Genes                                                                 | Benjamini |
| GOTERM_BP_FAT                               | GO:0007243~protein kinase cascade      | 9     | 0.0014  | GADD45B, NOTCH4, SCG2, ADRA1B, GADD45G, MARK1, SIK1, MAPK8IP1, MAP3K6 | 0.2232    |
| SP_PIR_KEYWORDS                             | Differentiation                        | 5     | 0.2126  | GADD45B, NOTCH4, GADD45G, SIK1, CREM                                  | 0.9289    |
| GOTERM_BP_FAT                               | GO:0051726~regulation of cell cycle    | 4     | 0.3049  | JUN, GADD45B, GADD45G, SIK1                                           | 0.9893    |
| SP_PIR_KEYWORDS                             | Developmental protein                  | 6     | 0.3730  | GADD45B, NOTCH4, GADD45G, SIK1, NUMB, CREM                            | 0.9531    |
| <b>Annotation Cluster 5</b>                 |                                        |       |         |                                                                       |           |
| <b>Enrichment Score: 0.9373017376402812</b> |                                        |       |         |                                                                       |           |
| Category                                    | Term                                   | Count | P-Value | Genes                                                                 | Benjamini |
| UP_SEQ_FEATURE                              | DNA-binding region:Basic motif         | 6     | 0.0015  | JUN, BHLHE40, MAFK, NFIL3, NPAS4, CREM                                | 0.2688    |
| INTERPRO                                    | IPR004827: Basic-leucine zipper        | 4     | 0.0034  | JUN, MAFK, NFIL3, CREM                                                | 0.6080    |

|                 |                                                       |    |        |                                                                                                                         |        |
|-----------------|-------------------------------------------------------|----|--------|-------------------------------------------------------------------------------------------------------------------------|--------|
|                 | (bZIP) transcription factor                           |    |        |                                                                                                                         |        |
| SMART           | SM00338: BRLZ                                         | 4  | 0.0044 | JUN, MAFK, NFIL3, CREM                                                                                                  | 0.2493 |
| UP_SEQ_FEATURE  | Domain: Leucine-zipper                                | 4  | 0.0195 | JUN, MAFK, NFIL3, CREM                                                                                                  | 0.6892 |
| SP_PIR_KEYWORDS | Repressor                                             | 7  | 0.0249 | CRY1, MAFK, CIRBP, TCF25, NFIL3, TLE3, CREM                                                                             | 0.4276 |
| GOTERM_MF_FAT   | GO:0046983~protein dimerization activity              | 7  | 0.0839 | JUN, LIMK1, NOTCH4, MAFK, NFIL3, NPAS4, CREM                                                                            | 0.9893 |
| GOTERM_BP_FAT   | GO:0006355~regulation of transcription, DNA-dependent | 16 | 0.0873 | TESC, JUN, KLF9, STRN3, NOTCH4, BHLHE40, MAFK, PER1, TCF25, NPAS4, CREM, KCNH1, SIK1, NFIL3, MAPK8IP1, TLE3             | 0.9572 |
| GOTERM_BP_FAT   | GO:0051252~regulation of RNA metabolic process        | 16 | 0.1011 | TESC, JUN, KLF9, STRN3, NOTCH4, BHLHE40, MAFK, PER1, TCF25, NPAS4, CREM, KCNH1, SIK1, NFIL3, MAPK8IP1, TLE3             | 0.9599 |
| GOTERM_MF_FAT   | GO:0003700~transcription factor activity              | 9  | 0.1803 | KLF9, JUN, STRN3, CCRN4L, BHLHE40, MAFK, TCF25, NFIL3, CREM                                                             | 0.9942 |
| GOTERM_BP_FAT   | GO:0006350~transcription                              | 16 | 0.2378 | JUN, KLF9, NOTCH4, BTG2, BHLHE40, CRY1, MAFK, PER1, TCF25, NPAS4, CREM, PHRF1, CCRN4L, NFIL3, TLE3, ADRM1               | 0.9861 |
| GOTERM_MF_FAT   | GO:0030528~transcription regulator activity           | 11 | 0.3427 | KLF9, JUN, STRN3, CCRN4L, BHLHE40, SIK1, MAFK, TCF25, NFIL3, NPAS4, CREM                                                | 0.9956 |
| GOTERM_BP_FAT   | GO:0045449~regulation of transcription                | 18 | 0.3446 | TESC, JUN, KLF9, STRN3, NOTCH4, BTG2, BHLHE40, CRY1, MAFK, PER1, TCF25, NPAS4, CREM, KCNH1, SIK1, NFIL3, MAPK8IP1, TLE3 | 0.9857 |
| SP_PIR_KEYWORDS | Transcription regulation                              | 13 | 0.3485 | JUN, KLF9, NOTCH4, BTG2, CRY1, BHLHE40, MAFK, PER1, TCF25, NPAS4, CREM, NFIL3, TLE3                                     | 0.9682 |

| SP_PIR_KEYWORDS                             | Nucleus                                                                | 25    | 0.3550  | JUN, KLF9, NOTCH4, RTEL1, BHLHE40, PER1, ANXA11, CREM, CIRBP, NFIL3, MAPK8IP1, PAK1IP1, CRY1, MAFK, TCF25, SESN1, NPAS4, DMP1, ASPA, SIK1, CAMKK1, GNL3, CMIP, TLE3, ADRM1 | 0.9658    |
|---------------------------------------------|------------------------------------------------------------------------|-------|---------|----------------------------------------------------------------------------------------------------------------------------------------------------------------------------|-----------|
| SP_PIR_KEYWORDS                             | Transcription                                                          | 13    | 0.3775  | JUN, KLF9, NOTCH4, BTG2, CRY1, BHLHE40, MAFK, PER1, TCF25, NPAS4, CREM, NFIL3, TLE3                                                                                        | 0.9500    |
| GOTERM_BP_FAT                               | GO:0006357~regulation of transcription from RNA polymerase II promoter | 6     | 0.4204  | KLF9, JUN, STRN3, SIK1, TCF25, NPAS4                                                                                                                                       | 0.9863    |
| GOTERM_MF_FAT                               | GO:0008134~transcription factor binding                                | 4     | 0.5551  | JUN, TOB2, NFIL3, CREM                                                                                                                                                     | 0.9996    |
| GOTERM_MF_FAT                               | GO:0043565~sequence-specific DNA binding                               | 4     | 0.6700  | JUN, MAFK, NFIL3, CREM                                                                                                                                                     | 0.9998    |
| SP_PIR_KEYWORDS                             | DNA-binding                                                            | 9     | 0.7571  | KLF9, JUN, RTEL1, BHLHE40, MAFK, TCF25, NFIL3, NPAS4, CREM                                                                                                                 | 0.9957    |
| GOTERM_MF_FAT                               | GO:0003677~DNA binding                                                 | 12    | 0.7838  | KLF9, JUN, STRN3, CCRN4L, RTEL1, BHLHE40, CRY1, MAFK, TCF25, NFIL3, NPAS4, CREM                                                                                            | 0.9999    |
| <b>Annotation Cluster 6</b>                 |                                                                        |       |         |                                                                                                                                                                            |           |
| <b>Enrichment Score: 0.8511405646592396</b> |                                                                        |       |         |                                                                                                                                                                            |           |
| Category                                    | Term                                                                   | Count | P-Value | Genes                                                                                                                                                                      | Benjamini |
| GOTERM_BP_FAT                               | GO:0033554~cellular response to stress                                 | 9     | 0.0172  | JUN, BTG2, GADD45G, RTEL1, CRY1, SESN1, MAPK8IP1, MAP3K6, RTN4RL2                                                                                                          | 0.7527    |
| GOTERM_BP_FAT                               | GO:0006974~response to DNA damage stimulus                             | 5     | 0.1736  | BTG2, GADD45G, RTEL1, CRY1, SESN1                                                                                                                                          | 0.9710    |

|                                             |                                          |              |                |                                                       |                  |
|---------------------------------------------|------------------------------------------|--------------|----------------|-------------------------------------------------------|------------------|
| GOTERM_BP_FAT                               | GO:0006281~DNA repair                    | 4            | 0.2306         | BTG2, GADD45G, RTEL1, CRY1                            | 0.9853           |
| GOTERM_BP_FAT                               | GO:0006259~DNA metabolic process         | 4            | 0.5714         | BTG2, GADD45G, RTEL1, CRY1                            | 0.9964           |
| <b>Annotation Cluster 7</b>                 |                                          |              |                |                                                       |                  |
| <b>Enrichment Score: 0.822982321837618</b>  |                                          |              |                |                                                       |                  |
| <b>Category</b>                             | <b>Term</b>                              | <b>Count</b> | <b>P-Value</b> | <b>Genes</b>                                          | <b>Benjamini</b> |
| UP_SEQ_FEATURE                              | DNA-binding region: Basic motif          | 6            | 0.0015         | JUN, BHLHE40, MAFK, NFIL3, NPAS4, CREM                | 0.2688           |
| GOTERM_MF_FAT                               | GO:0046983~protein dimerization activity | 7            | 0.0839         | JUN, LIMK1, NOTCH4, MAFK, NFIL3, NPAS4, CREM          | 0.9893           |
| SP_PIR_KEYWORDS                             | Activator                                | 5            | 0.2795         | NOTCH4, CIRBP, NFIL3, NPAS4, CREM                     | 0.9671           |
| GOTERM_CC_FAT                               | GO:0005667~transcription factor complex  | 3            | 0.3016         | JUN, NPAS4, CREM                                      | 0.9943           |
| GOTERM_CC_FAT                               | GO:0005654~nucleoplasm                   | 7            | 0.3156         | JUN, STRN3, CIRBP, GNL3, NPAS4, ANXA11, CREM          | 0.9798           |
| GOTERM_CC_FAT                               | GO:0031981~nuclear lumen                 | 8            | 0.6490         | JUN, STRN3, CIRBP, GNL3, NPAS4, ANXA11, PAK1IP1, CREM | 0.9945           |
| GOTERM_CC_FAT                               | GO:0044451~nucleoplasm part              | 3            | 0.7943         | JUN, NPAS4, CREM                                      | 0.9979           |
| <b>Annotation Cluster 8</b>                 |                                          |              |                |                                                       |                  |
| <b>Enrichment Score: 0.7986265184403722</b> |                                          |              |                |                                                       |                  |
| <b>Category</b>                             | <b>Term</b>                              | <b>Count</b> | <b>P-Value</b> | <b>Genes</b>                                          | <b>Benjamini</b> |
| GOTERM_BP_FAT                               | GO:0009628~response to abiotic stimulus  | 6            | 0.0639         | DUSP1, JUN, PITPNM1, ADRA1B, BTG2, CIRBP              | 0.9297           |
| GOTERM_BP_FAT                               | GO:0009416~response to light stimulus    | 3            | 0.1927         | DUSP1, PITPNM1, ADRA1B                                | 0.9772           |
| GOTERM_BP_FAT                               | GO:0009314~response to radiation         | 3            | 0.3264         | DUSP1, PITPNM1, ADRA1B                                | 0.9893           |
| <b>Annotation Cluster 9</b>                 |                                          |              |                |                                                       |                  |
| <b>Enrichment Score: 0.7685351669695512</b> |                                          |              |                |                                                       |                  |
| <b>Category</b>                             | <b>Term</b>                              | <b>Count</b> | <b>P-Value</b> | <b>Genes</b>                                          | <b>Benjamini</b> |

| SP_PIR_KEYWORDS                             | Apoptosis                                            | 6     | 0.0470  | MRPL41, GADD45B, GADD45G, RTEL1, RASSF5, FEM1B      | 0.5390    |
|---------------------------------------------|------------------------------------------------------|-------|---------|-----------------------------------------------------|-----------|
| GOTERM_BP_FAT                               | GO:0006915~apoptosis                                 | 7     | 0.1393  | MRPL41, JUN, GADD45B, GADD45G, RTEL1, RASSF5, FEM1B | 0.9664    |
| GOTERM_BP_FAT                               | GO:0012501~programmed cell death                     | 7     | 0.1464  | MRPL41, JUN, GADD45B, GADD45G, RTEL1, RASSF5, FEM1B | 0.9689    |
| UP_TISSUE                                   | Colon carcinoma                                      | 3     | 0.2380  | GADD45B, GADD45G, RTEL1                             | 0.9745    |
| GOTERM_BP_FAT                               | GO:0008219~cell death                                | 7     | 0.2426  | MRPL41, JUN, GADD45B, GADD45G, RTEL1, RASSF5, FEM1B | 0.9862    |
| GOTERM_BP_FAT                               | GO:0016265~death                                     | 7     | 0.2475  | MRPL41, JUN, GADD45B, GADD45G, RTEL1, RASSF5, FEM1B | 0.9850    |
| GOTERM_BP_FAT                               | GO:0051726~regulation of cell cycle                  | 4     | 0.3049  | JUN, GADD45B, GADD45G, SIK1                         | 0.9893    |
| <b>Annotation Cluster 10</b>                |                                                      |       |         |                                                     |           |
| <b>Enrichment Score: 0.7485071613471423</b> |                                                      |       |         |                                                     |           |
| Category                                    | Term                                                 | Count | P-Value | Genes                                               | Benjamini |
| GOTERM_BP_FAT                               | GO:0048514~blood vessel morphogenesis                | 5     | 0.0349  | JUN, NOTCH4, SCG2, ADRA1B, PLAT                     | 0.8827    |
| GOTERM_BP_FAT                               | GO:0001568~blood vessel development                  | 5     | 0.0550  | JUN, NOTCH4, SCG2, ADRA1B, PLAT                     | 0.9349    |
| GOTERM_BP_FAT                               | GO:0001944~vasculature development                   | 5     | 0.0591  | JUN, NOTCH4, SCG2, ADRA1B, PLAT                     | 0.9366    |
| GOTERM_BP_FAT                               | GO:0007611~learning or memory                        | 3     | 0.1372  | JUN, ADRA1B, CRHBP                                  | 0.9716    |
| GOTERM_BP_FAT                               | GO:0007610~behavior                                  | 6     | 0.1389  | JUN, SCG2, ADRA1B, PGLYRP1, DSCAM, CRHBP            | 0.9696    |
| GOTERM_BP_FAT                               | GO:0001525~angiogenesis                              | 3     | 0.2140  | JUN, NOTCH4, SCG2                                   | 0.9827    |
| GOTERM_BP_FAT                               | GO:0008284~positive regulation of cell proliferation | 4     | 0.4369  | JUN, NOTCH4, SCG2, MARCKSL1                         | 0.9868    |
| GOTERM_BP_FAT                               | GO:0050877~neurological system process               | 5     | 0.9314  | JUN, GRIK5, ADRA1B, PLAT, CRHBP                     | 1         |
| GOTERM_BP_FAT                               | GO:0050890~cognition                                 | 3     | 0.9728  | JUN, ADRA1B, CRHBP                                  | 1         |

| <b>Annotation Cluster 11</b>                |                                                             |              |                |                                                                       |                  |
|---------------------------------------------|-------------------------------------------------------------|--------------|----------------|-----------------------------------------------------------------------|------------------|
| <b>Enrichment Score: 0.7371450203624088</b> |                                                             |              |                |                                                                       |                  |
| <b>Category</b>                             | <b>Term</b>                                                 | <b>Count</b> | <b>P-Value</b> | <b>Genes</b>                                                          | <b>Benjamini</b> |
| GOTERM_BP_FAT                               | GO:0007243~protein kinase cascade                           | 9            | 0.0014         | GADD45B, NOTCH4, SCG2, ADRA1B, GADD45G, MARK1, SIK1, MAPK8IP1, MAP3K6 | 0.2232           |
| GOTERM_BP_FAT                               | GO:0033554~cellular response to stress                      | 9            | 0.0172         | JUN, BTG2, GADD45G, RTEL1, CRY1, SESN1, MAPK8IP1, MAP3K6, RTN4RL2     | 0.7527           |
| GOTERM_BP_FAT                               | GO:0000165~MAPKKK cascade                                   | 5            | 0.0226         | GADD45B, SCG2, GADD45G, MAPK8IP1, MAP3K6                              | 0.7777           |
| KEGG_PATHWAY                                | hsa04010:MAPK signaling pathway                             | 6            | 0.0423         | DUSP1, JUN, GADD45B, GADD45G, MAPK8IP1, MAP3K6                        | 0.5539           |
| GOTERM_BP_FAT                               | GO:0006469~negative regulation of protein kinase activity   | 3            | 0.0917         | GADD45B, GADD45G, MAPK8IP1                                            | 0.9578           |
| GOTERM_BP_FAT                               | GO:0033673~negative regulation of kinase activity           | 3            | 0.0971         | GADD45B, GADD45G, MAPK8IP1                                            | 0.9599           |
| GOTERM_BP_FAT                               | GO:0051348~negative regulation of transferase activity      | 3            | 0.1082         | GADD45B, GADD45G, MAPK8IP1                                            | 0.9637           |
| GOTERM_BP_FAT                               | GO:0031399~regulation of protein modification process       | 4            | 0.2477         | JUN, MAPK8IP1, MAP3K6, FEM1B                                          | 0.9838           |
| GOTERM_BP_FAT                               | GO:0001932~regulation of protein amino acid phosphorylation | 3            | 0.2680         | JUN, MAPK8IP1, MAP3K6                                                 | 0.9848           |
| GOTERM_BP_FAT                               | GO:0042325~regulation of phosphorylation                    | 5            | 0.2893         | JUN, GADD45B, GADD45G, MAPK8IP1, MAP3K6                               | 0.9879           |
| GOTERM_BP_FAT                               | GO:0051174~regulation of phosphorus metabolic process       | 5            | 0.3144         | JUN, GADD45B, GADD45G, MAPK8IP1, MAP3K6                               | 0.9887           |
| GOTERM_BP_FAT                               | GO:0019220~regulation of phosphate metabolic process        | 5            | 0.3144         | JUN, GADD45B, GADD45G, MAPK8IP1, MAP3K6                               | 0.9887           |



|                                             |                                                             |              |                |                                    |                  |
|---------------------------------------------|-------------------------------------------------------------|--------------|----------------|------------------------------------|------------------|
| GOTERM_BP_FAT                               | GO:0045859~regulation of protein kinase activity            | 4            | 0.3273         | GADD45B, GADD45G, MAPK8IP1, MAP3K6 | 0.9887           |
| GOTERM_BP_FAT                               | GO:0043549~regulation of kinase activity                    | 4            | 0.3466         | GADD45B, GADD45G, MAPK8IP1, MAP3K6 | 0.9844           |
| GOTERM_BP_FAT                               | GO:0051338~regulation of transferase activity               | 4            | 0.3706         | GADD45B, GADD45G, MAPK8IP1, MAP3K6 | 0.9841           |
| GOTERM_BP_FAT                               | GO:0045860~positive regulation of protein kinase activity   | 3            | 0.3752         | GADD45B, GADD45G, MAP3K6           | 0.9826           |
| GOTERM_BP_FAT                               | GO:0033674~positive regulation of kinase activity           | 3            | 0.3918         | GADD45B, GADD45G, MAP3K6           | 0.9841           |
| GOTERM_BP_FAT                               | GO:0051347~positive regulation of transferase activity      | 3            | 0.4103         | GADD45B, GADD45G, MAP3K6           | 0.9864           |
| GOTERM_BP_FAT                               | GO:0043086~negative regulation of catalytic activity        | 3            | 0.4834         | GADD45B, GADD45G, MAPK8IP1         | 0.9916           |
| GOTERM_BP_FAT                               | GO:0032268~regulation of cellular protein metabolic process | 4            | 0.5267         | JUN, MAPK8IP1, MAP3K6, FEM1B       | 0.9945           |
| GOTERM_BP_FAT                               | GO:0044092~negative regulation of molecular function        | 3            | 0.5845         | GADD45B, GADD45G, MAPK8IP1         | 0.9966           |
| GOTERM_BP_FAT                               | GO:0043085~positive regulation of catalytic activity        | 3            | 0.8129         | GADD45B, GADD45G, MAP3K6           | 0.9999           |
| GOTERM_BP_FAT                               | GO:0044093~positive regulation of molecular function        | 3            | 0.8623         | GADD45B, GADD45G, MAP3K6           | 1                |
| <b>Annotation Cluster 12</b>                |                                                             |              |                |                                    |                  |
| <b>Enrichment Score: 0.6935395708847507</b> |                                                             |              |                |                                    |                  |
| <b>Category</b>                             | <b>Term</b>                                                 | <b>Count</b> | <b>P-Value</b> | <b>Genes</b>                       | <b>Benjamini</b> |
| GOTERM_BP_FAT                               | GO:0000904~cell morphogenesis involved in                   | 5            | 0.0544         | NOTCH4, NUMB, DSCAM, BAI1, RTN4RL2 | 0.9445           |

|                                            |                                                                  |              |                |                                                                 |                  |
|--------------------------------------------|------------------------------------------------------------------|--------------|----------------|-----------------------------------------------------------------|------------------|
|                                            | differentiation                                                  |              |                |                                                                 |                  |
| GOTERM_BP_FAT                              | GO:0048667~cell morphogenesis involved in neuron differentiation | 4            | 0.1231         | NUMB, DSCAM, BAI1, RTN4RL2                                      | 0.9705           |
| GOTERM_BP_FAT                              | GO:0048812~neuron projection morphogenesis                       | 4            | 0.1283         | NUMB, DSCAM, BAI1, RTN4RL2                                      | 0.9713           |
| GOTERM_BP_FAT                              | GO:0000902~cell morphogenesis                                    | 5            | 0.1545         | NOTCH4, NUMB, DSCAM, BAI1, RTN4RL2                              | 0.9690           |
| GOTERM_BP_FAT                              | GO:0048858~cell projection morphogenesis                         | 4            | 0.1723         | NUMB, DSCAM, BAI1, RTN4RL2                                      | 0.9727           |
| GOTERM_BP_FAT                              | GO:0032990~cell part morphogenesis                               | 4            | 0.1883         | NUMB, DSCAM, BAI1, RTN4RL2                                      | 0.9771           |
| GOTERM_BP_FAT                              | GO:0031175~neuron projection development                         | 4            | 0.1883         | NUMB, DSCAM, BAI1, RTN4RL2                                      | 0.9771           |
| GOTERM_BP_FAT                              | GO:0032989~cellular component morphogenesis                      | 5            | 0.2019         | NOTCH4, NUMB, DSCAM, BAI1, RTN4RL2                              | 0.9795           |
| GOTERM_BP_FAT                              | GO:0030182~neuron differentiation                                | 5            | 0.2530         | BTG2, NUMB, DSCAM, BAI1, RTN4RL2                                | 0.9828           |
| GOTERM_CC_FAT                              | GO:0031226~intrinsic to plasma membrane                          | 9            | 0.3031         | NOTCH4, ADRA1B, KCNH1, NUMB, DSCAM, BAI1, TYRO3, ADRM1, RTN4RL2 | 0.9911           |
| GOTERM_BP_FAT                              | GO:0007409~axonogenesis                                          | 3            | 0.3113         | NUMB, BAI1, RTN4RL2                                             | 0.9889           |
| GOTERM_BP_FAT                              | GO:0048666~neuron development                                    | 4            | 0.3177         | NUMB, DSCAM, BAI1, RTN4RL2                                      | 0.9885           |
| GOTERM_BP_FAT                              | GO:0030030~cell projection organization                          | 4            | 0.3642         | NUMB, DSCAM, BAI1, RTN4RL2                                      | 0.9834           |
| GOTERM_CC_FAT                              | GO:0005887~integral to plasma membrane                           | 8            | 0.4319         | NOTCH4, ADRA1B, KCNH1, NUMB, DSCAM, BAI1, TYRO3, ADRM1          | 0.9938           |
| <b>Annotation Cluster 13</b>               |                                                                  |              |                |                                                                 |                  |
| <b>Enrichment Score: 0.674203252406384</b> |                                                                  |              |                |                                                                 |                  |
| <b>Category</b>                            | <b>Term</b>                                                      | <b>Count</b> | <b>P-Value</b> | <b>Genes</b>                                                    | <b>Benjamini</b> |
| GOTERM_BP_FAT                              | GO:0006366~transcription from RNA polymerase II promoter         | 4            | 0.1567         | CCRN4L, PHRF1, NFIL3, ADRM1                                     | 0.9675           |
| GOTERM_BP_FAT                              | GO:0006351~transcription, DNA-dependent                          | 4            | 0.2430         | CCRN4L, PHRF1, NFIL3, ADRM1                                     | 0.9850           |

|                                             |                                            |              |                |                                                      |                  |
|---------------------------------------------|--------------------------------------------|--------------|----------------|------------------------------------------------------|------------------|
| GOTERM_BP_FAT                               | GO:0032774~RNA biosynthetic process        | 4            | 0.2493         | CCRN4L, PHRF1, NFIL3, ADRM1                          | 0.9829           |
| <b>Annotation Cluster 14</b>                |                                            |              |                |                                                      |                  |
| <b>Enrichment Score: 0.6438870427234156</b> |                                            |              |                |                                                      |                  |
| <b>Category</b>                             | <b>Term</b>                                | <b>Count</b> | <b>P-Value</b> | <b>Genes</b>                                         | <b>Benjamini</b> |
| UP_SEQ_FEATURE                              | Domain: Fibronectin type-III 2             | 3            | 0.1459         | DSCAM, RIMBP2, TYRO3                                 | 0.9787           |
| UP_SEQ_FEATURE                              | Domain: Fibronectin type-III 1             | 3            | 0.1477         | DSCAM, RIMBP2, TYRO3                                 | 0.9695           |
| INTERPRO                                    | IPR008957: Fibronectin, type III-like fold | 3            | 0.2825         | DSCAM, RIMBP2, TYRO3                                 | 0.9985           |
| INTERPRO                                    | IPR003961: Fibronectin, type III           | 3            | 0.2952         | DSCAM, RIMBP2, TYRO3                                 | 0.9983           |
| SMART                                       | SM00060:FN3                                | 3            | 0.3357         | DSCAM, RIMBP2, TYRO3                                 | 0.9951           |
| <b>Annotation Cluster 15</b>                |                                            |              |                |                                                      |                  |
| <b>Enrichment Score: 0.6220131216467188</b> |                                            |              |                |                                                      |                  |
| <b>Category</b>                             | <b>Term</b>                                | <b>Count</b> | <b>P-Value</b> | <b>Genes</b>                                         | <b>Benjamini</b> |
| SP_PIR_KEYWORDS                             | Ubl conjugation                            | 7            | 0.0829         | BHLHE40, NUMB, PER1, RIMBP2, MAPK8IP1, ADRM1, SORBS2 | 0.6399           |
| SP_PIR_KEYWORDS                             | SH3 domain                                 | 3            | 0.2942         | RIMBP2, MAPK8IP1, SORBS2                             | 0.9675           |
| INTERPRO                                    | IPR001452:Src homology-3 domain            | 3            | 0.3434         | RIMBP2, MAPK8IP1, SORBS2                             | 0.9976           |
| SMART                                       | SM00326:SH3                                | 3            | 0.3881         | RIMBP2, MAPK8IP1, SORBS2                             | 0.9815           |
| <b>Annotation Cluster 16</b>                |                                            |              |                |                                                      |                  |
| <b>Enrichment Score: 0.6023790117034558</b> |                                            |              |                |                                                      |                  |
| <b>Category</b>                             | <b>Term</b>                                | <b>Count</b> | <b>P-Value</b> | <b>Genes</b>                                         | <b>Benjamini</b> |
| GOTERM_CC_FAT                               | GO:0030054~cell junction                   | 6            | 0.1348         | GRIK5, LIMK1, CNKSR3, BAI1, RIMBP2, SYT12            | 0.9990           |
| GOTERM_CC_FAT                               | GO:0045202~synapse                         | 4            | 0.2850         | GRIK5, PLAT, RIMBP2, SYT12                           | 0.9990           |
| SP_PIR_KEYWORDS                             | Synapse                                    | 3            | 0.2999         | GRIK5, RIMBP2, SYT12                                 | 0.9639           |
| SP_PIR_KEYWORDS                             | Cell junction                              | 4            | 0.3380         | GRIK5, CNKSR3, RIMBP2, SYT12                         | 0.9691           |

| <b>Annotation Cluster 17</b>                |                                                 |              |                |                                                                          |                  |
|---------------------------------------------|-------------------------------------------------|--------------|----------------|--------------------------------------------------------------------------|------------------|
| <b>Enrichment Score: 0.556066340480945</b>  |                                                 |              |                |                                                                          |                  |
| <b>Category</b>                             | <b>Term</b>                                     | <b>Count</b> | <b>P-Value</b> | <b>Genes</b>                                                             | <b>Benjamini</b> |
| GOTERM_BP_FAT                               | GO:0009628~response to abiotic stimulus         | 6            | 0.0639         | DUSP1, JUN, PITPNM1, ADRA1B, BTG2, CIRBP                                 | 0.9297           |
| GOTERM_BP_FAT                               | GO:0014070~response to organic cyclic substance | 3            | 0.1573         | JUN, ADRA1B, BTG2                                                        | 0.9649           |
| GOTERM_BP_FAT                               | GO:0009719~response to endogenous stimulus      | 4            | 0.4229         | DUSP1, STRN3, ADRA1B, BTG2                                               | 0.9861           |
| GOTERM_BP_FAT                               | GO:0010033~response to organic substance        | 5            | 0.6133         | DUSP1, JUN, STRN3, ADRA1B, BTG2                                          | 0.9977           |
| GOTERM_BP_FAT                               | GO:0009725~response to hormone stimulus         | 3            | 0.6361         | DUSP1, STRN3, BTG2                                                       | 0.9984           |
| <b>Annotation Cluster 18</b>                |                                                 |              |                |                                                                          |                  |
| <b>Enrichment Score: 0.5039578184612449</b> |                                                 |              |                |                                                                          |                  |
| <b>Category</b>                             | <b>Term</b>                                     | <b>Count</b> | <b>P-Value</b> | <b>Genes</b>                                                             | <b>Benjamini</b> |
| UP_SEQ_FEATURE                              | Domain: PH                                      | 4            | 0.1250         | IQSEC3, CMIP, ADRM1, PLEKHG3                                             | 0.9687           |
| INTERPRO                                    | IPR001849: Pleckstrin homology                  | 3            | 0.4706         | IQSEC3, CMIP, PLEKHG3                                                    | 0.9998           |
| SMART                                       | SM00233: PH                                     | 3            | 0.5230         | IQSEC3, CMIP, PLEKHG3                                                    | 0.9952           |
| <b>Annotation Cluster 19</b>                |                                                 |              |                |                                                                          |                  |
| <b>Enrichment Score: 0.5024514773525679</b> |                                                 |              |                |                                                                          |                  |
| <b>Category</b>                             | <b>Term</b>                                     | <b>Count</b> | <b>P-Value</b> | <b>Genes</b>                                                             | <b>Benjamini</b> |
| GOTERM_CC_FAT                               | GO:0000267~cell fraction                        | 10           | 0.1111         | PDE4B, PITPNM1, CYP46A1, PCSK2, ADRA1B, RTEL1, DSCAM, CRHBP, PFKP, ADRM1 | 0.9998           |
| GOTERM_CC_FAT                               | GO:0005626~insoluble fraction                   | 6            | 0.4511         | PDE4B, PITPNM1, CYP46A1, ADRA1B, DSCAM, ADRM1                            | 0.9918           |
| GOTERM_CC_FAT                               | GO:0005624~membrane fraction                    | 5            | 0.6201         | PITPNM1, CYP46A1, ADRA1B, DSCAM, ADRM1                                   | 0.9931           |

| <b>Annotation Cluster 20</b>                 |                                                                                                         |              |                |                                                |                  |
|----------------------------------------------|---------------------------------------------------------------------------------------------------------|--------------|----------------|------------------------------------------------|------------------|
| <b>Enrichment Score: 0.49517158876866874</b> |                                                                                                         |              |                |                                                |                  |
| <b>Category</b>                              | <b>Term</b>                                                                                             | <b>Count</b> | <b>P-Value</b> | <b>Genes</b>                                   | <b>Benjamini</b> |
| GOTERM_MF_FAT                                | GO:0005083~small GTPase regulator activity                                                              | 4            | 0.1998         | JUN, ALDH1A1, IQSEC3, PLEKHG3                  | 0.9787           |
| GOTERM_MF_FAT                                | GO:0030695~GTPase regulator activity                                                                    | 4            | 0.3977         | JUN, ALDH1A1, IQSEC3, PLEKHG3                  | 0.9981           |
| GOTERM_MF_FAT                                | GO:0060589~nucleoside-triphosphatase regulator activity                                                 | 4            | 0.4114         | JUN, ALDH1A1, IQSEC3, PLEKHG3                  | 0.9974           |
| <b>Annotation Cluster 21</b>                 |                                                                                                         |              |                |                                                |                  |
| <b>Enrichment Score: 0.4509765462766047</b>  |                                                                                                         |              |                |                                                |                  |
| <b>Category</b>                              | <b>Term</b>                                                                                             | <b>Count</b> | <b>P-Value</b> | <b>Genes</b>                                   | <b>Benjamini</b> |
| GOTERM_BP_FAT                                | GO:0010605~negative regulation of macromolecule metabolic process                                       | 7            | 0.2573         | JUN, STRN3, ADRA1B, BHLHE40, SIK1, PER1, TCF25 | 0.9828           |
| GOTERM_MF_FAT                                | GO:0016564~transcription repressor activity                                                             | 4            | 0.2622         | STRN3, BHLHE40, SIK1, NFIL3                    | 0.9903           |
| GOTERM_BP_FAT                                | GO:0016481~negative regulation of transcription                                                         | 5            | 0.2801         | STRN3, BHLHE40, SIK1, PER1, TCF25              | 0.9868           |
| GOTERM_BP_FAT                                | GO:0010629~negative regulation of gene expression                                                       | 5            | 0.3397         | STRN3, BHLHE40, SIK1, PER1, TCF25              | 0.9880           |
| GOTERM_BP_FAT                                | GO:0045892~negative regulation of transcription, DNA-dependent                                          | 4            | 0.3450         | STRN3, BHLHE40, SIK1, TCF25                    | 0.9850           |
| GOTERM_BP_FAT                                | GO:0045934~negative regulation of nucleobase, nucleoside, nucleotide and nucleic acid metabolic process | 5            | 0.3504         | STRN3, BHLHE40, SIK1, PER1, TCF25              | 0.9836           |
| GOTERM_BP_FAT                                | GO:0051253~negative regulation of RNA metabolic process                                                 | 4            | 0.3546         | STRN3, BHLHE40, SIK1, TCF25                    | 0.9828           |
| GOTERM_BP_FAT                                | GO:0051172~negative regulation of nitrogen compound metabolic process                                   | 5            | 0.3598         | STRN3, BHLHE40, SIK1, PER1, TCF25              | 0.9832           |
| GOTERM_BP_FAT                                | GO:0010558~negative regulation of macromolecule                                                         | 5            | 0.3972         | STRN3, BHLHE40, SIK1, PER1, TCF25              | 0.9845           |

|                                              | biosynthetic process                                                            |       |         |                                              |           |
|----------------------------------------------|---------------------------------------------------------------------------------|-------|---------|----------------------------------------------|-----------|
| GOTERM_BP_FAT                                | GO:0031327~negative regulation of cellular biosynthetic process                 | 5     | 0.4158  | STRN3, BHLHE40, SIK1, PER1, TCF25            | 0.9868    |
| GOTERM_BP_FAT                                | GO:0006357~regulation of transcription from RNA polymerase II promoter          | 6     | 0.4204  | KLF9, JUN, STRN3, SIK1, TCF25, NPAS4         | 0.9863    |
| GOTERM_BP_FAT                                | GO:0009890~negative regulation of biosynthetic process                          | 5     | 0.4317  | STRN3, BHLHE40, SIK1, PER1, TCF25            | 0.9865    |
| GOTERM_BP_FAT                                | GO:0000122~negative regulation of transcription from RNA polymerase II promoter | 3     | 0.4622  | STRN3, SIK1, TCF25                           | 0.9898    |
| <b>Annotation Cluster 22</b>                 |                                                                                 |       |         |                                              |           |
| <b>Enrichment Score: 0.44742085562098066</b> |                                                                                 |       |         |                                              |           |
| Category                                     | Term                                                                            | Count | P-Value | Genes                                        | Benjamini |
| INTERPRO                                     | IPR000742:EGF-like, type 3                                                      | 3     | 0.3036  | NOTCH4, PLAT, TENM3                          | 0.9979    |
| INTERPRO                                     | IPR006210:EGF-like                                                              | 3     | 0.3183  | NOTCH4, PLAT, TENM3                          | 0.9979    |
| SP_PIR_KEYWORDS                              | Egf-like domain                                                                 | 3     | 0.3321  | NOTCH4, PLAT, TENM3                          | 0.9719    |
| SMART                                        | SM00181:EGF                                                                     | 3     | 0.3609  | NOTCH4, PLAT, TENM3                          | 0.9922    |
| INTERPRO                                     | IPR013032:EGF-like region, conserved site                                       | 3     | 0.5001  | NOTCH4, PLAT, TENM3                          | 0.9999    |
| <b>Annotation Cluster 23</b>                 |                                                                                 |       |         |                                              |           |
| <b>Enrichment Score: 0.41195696553774774</b> |                                                                                 |       |         |                                              |           |
| Category                                     | Term                                                                            | Count | P-Value | Genes                                        | Benjamini |
| GOTERM_CC_FAT                                | GO:0005615~extracellular space                                                  | 6     | 0.2893  | PCSK2, NOTCH4, SCG2, PLAT, CRHBP, LIPE       | 0.9958    |
| GOTERM_CC_FAT                                | GO:0044421~extracellular region part                                            | 7     | 0.3898  | PCSK2, NOTCH4, SCG2, PLAT, CRHBP, LIPE, DMP1 | 0.9913    |
| SP_PIR_KEYWORDS                              | Cleavage on pair of basic residues                                              | 3     | 0.4077  | PCSK2, SCG2, PLAT                            | 0.9545    |
| GOTERM_CC_FAT                                | GO:0005576~extracellular region                                                 | 12    | 0.4894  | PCSK2, ARTN, NOTCH4, SCG2, RTEL1, PLAT,      | 0.9921    |

|                                             |                                                         |       |         | PGLYRP1, DSCAM, CRHBP, LIPE, DMP1, PLA1A       |           |
|---------------------------------------------|---------------------------------------------------------|-------|---------|------------------------------------------------|-----------|
| <b>Annotation Cluster 24</b>                |                                                         |       |         |                                                |           |
| <b>Enrichment Score: 0.3578417624010794</b> |                                                         |       |         |                                                |           |
| Category                                    | Term                                                    | Count | P-Value | Genes                                          | Benjamini |
| GOTERM_BP_FAT                               | GO:0042981~regulation of apoptosis                      | 7     | 0.3288  | DUSP1, JUN, SCG2, BTG2, RTEL1, MAPK8IP1, FEM1B | 0.9882    |
| GOTERM_BP_FAT                               | GO:0043067~regulation of programmed cell death          | 7     | 0.3372  | DUSP1, JUN, SCG2, BTG2, RTEL1, MAPK8IP1, FEM1B | 0.9883    |
| GOTERM_BP_FAT                               | GO:0010941~regulation of cell death                     | 7     | 0.3404  | DUSP1, JUN, SCG2, BTG2, RTEL1, MAPK8IP1, FEM1B | 0.9873    |
| GOTERM_BP_FAT                               | GO:0043066~negative regulation of apoptosis             | 4     | 0.3418  | SCG2, BTG2, RTEL1, MAPK8IP1                    | 0.9859    |
| GOTERM_BP_FAT                               | GO:0043069~negative regulation of programmed cell death | 4     | 0.3498  | SCG2, BTG2, RTEL1, MAPK8IP1                    | 0.9843    |
| GOTERM_BP_FAT                               | GO:0060548~negative regulation of cell death            | 4     | 0.3514  | SCG2, BTG2, RTEL1, MAPK8IP1                    | 0.9829    |
| GOTERM_BP_FAT                               | GO:0043065~positive regulation of apoptosis             | 3     | 0.7208  | DUSP1, JUN, FEM1B                              | 0.9996    |
| GOTERM_BP_FAT                               | GO:0043068~positive regulation of programmed cell death | 3     | 0.7244  | DUSP1, JUN, FEM1B                              | 0.9996    |
| GOTERM_BP_FAT                               | GO:0010942~positive regulation of cell death            | 3     | 0.7268  | DUSP1, JUN, FEM1B                              | 0.9996    |
| <b>Annotation Cluster 25</b>                |                                                         |       |         |                                                |           |
| <b>Enrichment Score: 0.3449708856453159</b> |                                                         |       |         |                                                |           |
| Category                                    | Term                                                    | Count | P-Value | Genes                                          | Benjamini |
| UP_SEQ_FEATURE                              | Domain:Ig-like C2-type 1                                | 3     | 0.2584  | CADM4, DSCAM, TYRO3                            | 0.9943    |
| UP_SEQ_FEATURE                              | Domain:Ig-like C2-type 2                                | 3     | 0.2603  | CADM4, DSCAM, TYRO3                            | 0.9933    |
| INTERPRO                                    | IPR003598:Immunoglobulin subtype 2                      | 3     | 0.3267  | CADM4, DSCAM, TYRO3                            | 0.9975    |
| SMART                                       | SM00408:IGc2                                            | 3     | 0.3700  | CADM4, DSCAM, TYRO3                            | 0.9863    |
| SP_PIR_KEYWORDS                             | Cell adhesion                                           | 4     | 0.3704  | CADM4, DSCAM, BAI1, TYRO3                      | 0.9622    |
| GOTERM_BP_FAT                               | GO:0007155~cell adhesion                                | 6     | 0.3888  | CADM4, CNKSR3, GNE, DSCAM, BAI1, TYRO3         | 0.9849    |

| GOTERM_BP_FAT                               | GO:0022610~biological adhesion                                                                          | 6            | 0.3899         | CADM4, CNKSR3, GNE, DSCAM, BAI1, TYRO3 | 0.9844           |
|---------------------------------------------|---------------------------------------------------------------------------------------------------------|--------------|----------------|----------------------------------------|------------------|
| INTERPRO                                    | IPR003599:Immunoglobulin subtype                                                                        | 3            | 0.5643         | CADM4, DSCAM, TYRO3                    | 0.9999           |
| SMART                                       | SM00409:IG                                                                                              | 3            | 0.6191         | CADM4, DSCAM, TYRO3                    | 0.9981           |
| SP_PIR_KEYWORDS                             | Immunoglobulin domain                                                                                   | 3            | 0.7002         | CADM4, DSCAM, TYRO3                    | 0.9930           |
| INTERPRO                                    | IPR007110:Immunoglobulin-like                                                                           | 3            | 0.7839         | CADM4, DSCAM, TYRO3                    | 1                |
| INTERPRO                                    | IPR013783:Immunoglobulin-like fold                                                                      | 3            | 0.8283         | CADM4, DSCAM, TYRO3                    | 1                |
| <b>Annotation Cluster 26</b>                |                                                                                                         |              |                |                                        |                  |
| <b>Enrichment Score: 0.3255558100565921</b> |                                                                                                         |              |                |                                        |                  |
| <b>Category</b>                             | <b>Term</b>                                                                                             | <b>Count</b> | <b>P-Value</b> | <b>Genes</b>                           | <b>Benjamini</b> |
| GOTERM_BP_FAT                               | GO:0045893~positive regulation of transcription, DNA-dependent                                          | 5            | 0.3038         | TESC, JUN, STRN3, NOTCH4, NPAS4        | 0.9899           |
| GOTERM_BP_FAT                               | GO:0051254~positive regulation of RNA metabolic process                                                 | 5            | 0.3091         | TESC, JUN, STRN3, NOTCH4, NPAS4        | 0.9893           |
| GOTERM_BP_FAT                               | GO:0045941~positive regulation of transcription                                                         | 5            | 0.4198         | TESC, JUN, STRN3, NOTCH4, NPAS4        | 0.9868           |
| GOTERM_BP_FAT                               | GO:0006357~regulation of transcription from RNA polymerase II promoter                                  | 6            | 0.4204         | KLF9, JUN, STRN3, SIK1, TCF25, NPAS4   | 0.9863           |
| GOTERM_BP_FAT                               | GO:0010628~positive regulation of gene expression                                                       | 5            | 0.4422         | TESC, JUN, STRN3, NOTCH4, NPAS4        | 0.9872           |
| GOTERM_BP_FAT                               | GO:0045935~positive regulation of nucleobase, nucleoside, nucleotide and nucleic acid metabolic process | 5            | 0.4977         | TESC, JUN, STRN3, NOTCH4, NPAS4        | 0.9928           |
| GOTERM_BP_FAT                               | GO:0051173~positive regulation of nitrogen compound metabolic process                                   | 5            | 0.5227         | TESC, JUN, STRN3, NOTCH4, NPAS4        | 0.9948           |
| GOTERM_BP_FAT                               | GO:0010557~positive regulation of macromolecule biosynthetic process                                    | 5            | 0.5350         | TESC, JUN, STRN3, NOTCH4, NPAS4        | 0.9949           |



| GOTERM_BP_FAT                                | GO:0010604~positive regulation of macromolecule metabolic process               | 6     | 0.5666  | TESC, JUN, STRN3, NOTCH4, ADRA1B, NPAS4                                                                                                                   | 0.9965    |
|----------------------------------------------|---------------------------------------------------------------------------------|-------|---------|-----------------------------------------------------------------------------------------------------------------------------------------------------------|-----------|
| GOTERM_BP_FAT                                | GO:0031328~positive regulation of cellular biosynthetic process                 | 5     | 0.5722  | TESC, JUN, STRN3, NOTCH4, NPAS4                                                                                                                           | 0.9963    |
| GOTERM_BP_FAT                                | GO:0009891~positive regulation of biosynthetic process                          | 5     | 0.5839  | TESC, JUN, STRN3, NOTCH4, NPAS4                                                                                                                           | 0.9967    |
| GOTERM_BP_FAT                                | GO:0045944~positive regulation of transcription from RNA polymerase II promoter | 3     | 0.6421  | JUN, STRN3, NPAS4                                                                                                                                         | 0.9984    |
| <b>Annotation Cluster 27</b>                 |                                                                                 |       |         |                                                                                                                                                           |           |
| <b>Enrichment Score: 0.30183580316266934</b> |                                                                                 |       |         |                                                                                                                                                           |           |
| Category                                     | Term                                                                            | Count | P-Value | Genes                                                                                                                                                     | Benjamini |
| GOTERM_CC_FAT                                | GO:0044459~plasma membrane part                                                 | 15    | 0.2565  | GRIK5, NOTCH4, ADRA1B, NUMB, RIMBP2, LIPE, TYRO3, RTN4RL2, SYT12, LIMK1, CNKSR3, KCNH1, DSCAM, BAI1, ADRM1                                                | 1         |
| GOTERM_CC_FAT                                | GO:0031226~intrinsic to plasma membrane                                         | 9     | 0.3031  | NOTCH4, ADRA1B, KCNH1, NUMB, DSCAM, BAI1, TYRO3, ADRM1, RTN4RL2                                                                                           | 0.9911    |
| SP_PIR_KEYWORDS                              | Cell membrane                                                                   | 13    | 0.4577  | GRIK5, PMEPA1, CAMK1G, NOTCH4, ADRA1B, RIMBP2, LIPE, TYRO3, RTN4RL2, GPR162, CNKSR3, BAI1, DSCAM                                                          | 0.9506    |
| GOTERM_CC_FAT                                | GO:0005886~plasma membrane                                                      | 21    | 0.5246  | TESC, GRIK5, PMEPA1, STRN3, NOTCH4, CAMK1G, ADRA1B, NUMB, RIMBP2, LIPE, TYRO3, RTN4RL2, SYT12, GPR162, LIMK1, CNKSR3, KCNH1, DSCAM, BAI1, ADRM1, MARCKSL1 | 0.9923    |
| SP_PIR_KEYWORDS                              | Membrane                                                                        | 29    | 0.8440  | PITPNM1, CADM4, CYP46A1, NOTCH4, CAMK1G, COQ7, NUMB, LIPE, TYRO3, RTN4RL2, SYT12,                                                                         | 0.9980    |

|                                              |                                                 |              |                |                                                                                                                                                                       |                  |
|----------------------------------------------|-------------------------------------------------|--------------|----------------|-----------------------------------------------------------------------------------------------------------------------------------------------------------------------|------------------|
|                                              |                                                 |              |                | GPR162, CNKSR3, KCNH1, DSCAM, BAI1, TENM3, GRIK5, HS3ST2, PMEPA1, STRN3, ADRA1B, RIMBP2, CHPF2, SEC61A2, TSPAN2, SLC35F4, COQ10B, KCNK12                              |                  |
| GOTERM_CC_FAT                                | GO:0031224~intrinsic to membrane                | 22           | 0.9808         | GRIK5, CADM4, CYP46A1, HS3ST2, PMEPA1, NOTCH4, ADRA1B, NUMB, TYRO3, CHPF2, RTN4RL2, SYT12, SEC61A2, GPR162, TSPAN2, KCNH1, SLC35F4, DSCAM, BAI1, TENM3, ADRM1, KCNK12 | 1                |
| <b>Annotation Cluster 28</b>                 |                                                 |              |                |                                                                                                                                                                       |                  |
| <b>Enrichment Score: 0.29578324848936166</b> |                                                 |              |                |                                                                                                                                                                       |                  |
| <b>Category</b>                              | <b>Term</b>                                     | <b>Count</b> | <b>P-Value</b> | <b>Genes</b>                                                                                                                                                          | <b>Benjamini</b> |
| GOTERM_CC_FAT                                | GO:0031410~cytoplasmic vesicle                  | 5            | 0.4363         | PCSK2, CAMK2G, PLAT, ANXA11, SYT12                                                                                                                                    | 0.9922           |
| GOTERM_CC_FAT                                | GO:0031982~vesicle                              | 5            | 0.4692         | PCSK2, CAMK2G, PLAT, ANXA11, SYT12                                                                                                                                    | 0.9918           |
| GOTERM_CC_FAT                                | GO:0016023~cytoplasmic membrane-bounded vesicle | 4            | 0.5551         | PCSK2, CAMK2G, PLAT, ANXA11                                                                                                                                           | 0.9906           |
| GOTERM_CC_FAT                                | GO:0031988~membranebounded vesicle              | 4            | 0.5773         | PCSK2, CAMK2G, PLAT, ANXA11                                                                                                                                           | 0.9915           |
| <b>Annotation Cluster 29</b>                 |                                                 |              |                |                                                                                                                                                                       |                  |
| <b>Enrichment Score: 0.24900590625427083</b> |                                                 |              |                |                                                                                                                                                                       |                  |
| <b>Category</b>                              | <b>Term</b>                                     | <b>Count</b> | <b>P-Value</b> | <b>Genes</b>                                                                                                                                                          | <b>Benjamini</b> |
| SP_PIR_KEYWORDS                              | Receptor                                        | 10           | 0.4289         | LENG1, GRIK5, GPR162, NOTCH4, ADRA1B, RTEL1, CRY1, BAI1, TYRO3, RTN4RL2                                                                                               | 0.9459           |
| SP_PIR_KEYWORDS                              | Cell membrane                                   | 13           | 0.4577         | GRIK5, PMEPA1, CAMK1G, NOTCH4, ADRA1B, RIMBP2, LIPE, TYRO3, RTN4RL2, GPR162, CNKSR3, BAI1, DSCAM                                                                      | 0.9506           |
| UP_SEQ_FEATURE                               | Topological domain: Extracellular               | 11           | 0.9122         | CADM4, GRIK5, GPR162, PMEPA1, NOTCH4, ADRA1B, TSPAN2, DSCAM, BAI1, TENM3, TYRO3                                                                                       | 1                |

| <b>Annotation Cluster 30</b>                 |                                          |              |                |                                                                                                                                                                                      |                  |  |
|----------------------------------------------|------------------------------------------|--------------|----------------|--------------------------------------------------------------------------------------------------------------------------------------------------------------------------------------|------------------|--|
| <b>Enrichment Score: 0.2306658195974082</b>  |                                          |              |                |                                                                                                                                                                                      |                  |  |
| <b>Category</b>                              | <b>Term</b>                              | <b>Count</b> | <b>P-Value</b> | <b>Genes</b>                                                                                                                                                                         | <b>Benjamini</b> |  |
| SP_PIR_KEYWORDS                              | Glycoprotein                             | 25           | 0.3715         | CADM4, PCSK2, NOTCH4, RTEL1, CRHBP, TYRO3, ANXA11, RTN4RL2, GPR162, ARTN, KCNH1, PLAT, PGLYRP1, BAI1, DSCAM, TENM3, GRIK5, HS3ST2, ADRA1B, CHPF2, DMP1, PLA1A, TSPAN2, ADRM1, KCNK12 | 0.9577           |  |
| UP_SEQ_FEATURE                               | Glycosylation site: N-linked (GlcNAc...) | 23           | 0.4798         | GRIK5, CADM4, HS3ST2, PCSK2, NOTCH4, ADRA1B, RTEL1, CRHBP, TYRO3, CHPF2, DMP1, RTN4RL2, PLA1A, GPR162, ARTN, TSPAN2, KCNH1, PLAT, PGLYRP1, DSCAM, BAI1, TENM3, KCNK12                | 0.9999           |  |
| GOTERM_CC_FAT                                | GO:0005576~extracellular region          | 12           | 0.4894         | PCSK2, ARTN, NOTCH4, SCG2, RTEL1, PLAT, PGLYRP1, DSCAM, CRHBP, LIPE, DMP1, PLA1A                                                                                                     | 0.9921           |  |
| UP_SEQ_FEATURE                               | Disulfide bond                           | 15           | 0.6112         | CADM4, PCSK2, HS3ST2, NOTCH4, ADRA1B, RTEL1, CRHBP, TYRO3, PLA1A, ARTN, PLAT, PGLYRP1, DSCAM, BAI1, TENM3                                                                            | 1                |  |
| SP_PIR_KEYWORDS                              | Disulfide bond                           | 15           | 0.6583         | CADM4, PCSK2, HS3ST2, NOTCH4, ADRA1B, RTEL1, CRHBP, TYRO3, PLA1A, ARTN, PLAT, PGLYRP1, DSCAM, BAI1, TENM3                                                                            | 0.9903           |  |
| SP_PIR_KEYWORDS                              | Signal                                   | 16           | 0.7188         | GRIK5, CADM4, PCSK2, SCG2, NOTCH4, RTEL1, CRHBP, TYRO3, DMP1, RTN4RL2, PLA1A, ARTN, PLAT, PGLYRP1, DSCAM, BAI1                                                                       | 0.9932           |  |
| UP_SEQ_FEATURE                               | Signal peptide                           | 16           | 0.7283         | GRIK5, CADM4, PCSK2, SCG2, NOTCH4, RTEL1, CRHBP, TYRO3, DMP1, RTN4RL2, PLA1A, ARTN, PLAT, PGLYRP1, DSCAM, BAI1                                                                       | 1                |  |
| SP_PIR_KEYWORDS                              | Secreted                                 | 8            | 0.7769         | ARTN, SCG2, RTEL1, PLAT, PGLYRP1, DSCAM, DMP1, PLA1A                                                                                                                                 | 0.9965           |  |
| <b>Annotation Cluster 31</b>                 |                                          |              |                |                                                                                                                                                                                      |                  |  |
| <b>Enrichment Score: 0.21109647410899354</b> |                                          |              |                |                                                                                                                                                                                      |                  |  |
| <b>Category</b>                              | <b>Term</b>                              | <b>Count</b> | <b>P-Value</b> | <b>Genes</b>                                                                                                                                                                         | <b>Benjamini</b> |  |
| GOTERM_CC_FAT                                | GO:0005654~nucleoplasm                   | 7            | 0.3156         | JUN, STRN3, CIRBP, GNL3, NPAS4,                                                                                                                                                      | 0.9798           |  |

|                                              |                                                        |       |         | ANXA11, CREM                                                  |           |
|----------------------------------------------|--------------------------------------------------------|-------|---------|---------------------------------------------------------------|-----------|
| GOTERM_CC_FAT                                | GO:0031981~nuclear lumen                               | 8     | 0.6490  | JUN, STRN3, CIRBP, GNL3, NPAS4, ANXA11, PAK1IP1, CREM         | 0.9945    |
| GOTERM_CC_FAT                                | GO:0070013~intracellular organelle lumen               | 9     | 0.7324  | MRPL41, JUN, STRN3, CIRBP, GNL3, NPAS4, ANXA11, PAK1IP1, CREM | 0.9978    |
| GOTERM_CC_FAT                                | GO:0043233~organelle lumen                             | 9     | 0.7562  | MRPL41, JUN, STRN3, CIRBP, GNL3, NPAS4, ANXA11, PAK1IP1, CREM | 0.9975    |
| GOTERM_CC_FAT                                | GO:0031974~membrane-enclosed lumen                     | 9     | 0.7758  | MRPL41, JUN, STRN3, CIRBP, GNL3, NPAS4, ANXA11, PAK1IP1, CREM | 0.9975    |
| <b>Annotation Cluster 32</b>                 |                                                        |       |         |                                                               |           |
| <b>Enrichment Score: 0.17834734692956647</b> |                                                        |       |         |                                                               |           |
| Category                                     | Term                                                   | Count | P-Value | Genes                                                         | Benjamini |
| GOTERM_BP_FAT                                | GO:0070271~protein complex biogenesis                  | 4     | 0.5700  | CNKSR3, WASF1, PFKP, ADRM1                                    | 0.9965    |
| GOTERM_BP_FAT                                | GO:0006461~protein complex assembly                    | 4     | 0.5700  | CNKSR3, WASF1, PFKP, ADRM1                                    | 0.9965    |
| GOTERM_BP_FAT                                | GO:0065003~macromolecular complex assembly             | 4     | 0.7525  | CNKSR3, WASF1, PFKP, ADRM1                                    | 0.9997    |
| GOTERM_BP_FAT                                | GO:0043933~macromolecular complex subunit organization | 4     | 0.7912  | CNKSR3, WASF1, PFKP, ADRM1                                    | 0.9999    |
| <b>Annotation Cluster 33</b>                 |                                                        |       |         |                                                               |           |
| <b>Enrichment Score: 0.1668762657503625</b>  |                                                        |       |         |                                                               |           |
| Category                                     | Term                                                   | Count | P-Value | Genes                                                         | Benjamini |
| SP_PIR_KEYWORDS                              | ionic channel                                          | 3     | 0.4890  | GRIK5, KCNH1, KCNK12                                          | 0.9562    |
| GOTERM_MF_FAT                                | GO:0022836~gated channel activity                      | 3     | 0.5234  | GRIK5, KCNH1, KCNK12                                          | 0.9994    |
| GOTERM_MF_FAT                                | GO:0005216~ion channel activity                        | 3     | 0.6433  | GRIK5, KCNH1, KCNK12                                          | 0.9998    |
| GOTERM_MF_FAT                                | GO:0022838~substrate specific channel activity         | 3     | 0.6600  | GRIK5, KCNH1, KCNK12                                          | 0.9998    |
| GOTERM_MF_FAT                                | GO:0015267~channel activity                            | 3     | 0.6786  | GRIK5, KCNH1, KCNK12                                          | 0.9998    |

|                                              |                                                       |              |                |                                                                                            |                  |
|----------------------------------------------|-------------------------------------------------------|--------------|----------------|--------------------------------------------------------------------------------------------|------------------|
| GOTERM_MF_FAT                                | GO:0022803~passive transmembrane transporter activity | 3            | 0.6799         | GRIK5, KCNH1, KCNK12                                                                       | 0.9997           |
| SP_PIR_KEYWORDS                              | Ion transport                                         | 3            | 0.8024         | GRIK5, KCNH1, KCNK12                                                                       | 0.9968           |
| GOTERM_BP_FAT                                | GO:0006811~ion transport                              | 4            | 0.8337         | GRIK5, CAMK2G, KCNH1, KCNK12                                                               | 1                |
| SP_PIR_KEYWORDS                              | Transport                                             | 6            | 0.9387         | GRIK5, SEC61A2, PITPNM1, SLC35F4, KCNH1, KCNK12                                            | 0.9999           |
| <b>Annotation Cluster 34</b>                 |                                                       |              |                |                                                                                            |                  |
| <b>Enrichment Score: 0.1407674184058494</b>  |                                                       |              |                |                                                                                            |                  |
| <b>Category</b>                              | <b>Term</b>                                           | <b>Count</b> | <b>P-Value</b> | <b>Genes</b>                                                                               | <b>Benjamini</b> |
| GOTERM_CC_FAT                                | GO:0005739~mitochondrion                              | 6            | 0.6842         | MRPL41, COQ7, CRY1, COQ10B, MRPS34, WASF1                                                  | 0.9960           |
| UP_SEQ_FEATURE                               | Transit peptide: Mitochondrion                        | 3            | 0.7002         | MRPL41, COQ7, COQ10B                                                                       | 1                |
| SP_PIR_KEYWORDS                              | Transit peptide                                       | 3            | 0.7069         | MRPL41, COQ7, COQ10B                                                                       | 0.9928           |
| SP_PIR_KEYWORDS                              | Mitochondrion                                         | 4            | 0.8075         | MRPL41, COQ7, COQ10B, MRPS34                                                               | 0.9967           |
| <b>Annotation Cluster 35</b>                 |                                                       |              |                |                                                                                            |                  |
| <b>Enrichment Score: 0.13343210896498828</b> |                                                       |              |                |                                                                                            |                  |
| <b>Category</b>                              | <b>Term</b>                                           | <b>Count</b> | <b>P-Value</b> | <b>Genes</b>                                                                               | <b>Benjamini</b> |
| GOTERM_CC_FAT                                | GO:0015630~microtubule cytoskeleton                   | 4            | 0.5539         | KIFC2, MARK1, ANXA11, RASSF5                                                               | 0.9921           |
| GOTERM_CC_FAT                                | GO:0005856~cytoskeleton                               | 7            | 0.7447         | KIFC2, MARK1, GNE, WASF1, ANXA11, RASSF5, SORBS2                                           | 0.9974           |
| GOTERM_CC_FAT                                | GO:0044430~cytoskeletal part                          | 3            | 0.9646         | KIFC2, ANXA11, RASSF5                                                                      | 1                |
| <b>Annotation Cluster 36</b>                 |                                                       |              |                |                                                                                            |                  |
| <b>Enrichment Score: 0.13243049963651077</b> |                                                       |              |                |                                                                                            |                  |
| <b>Category</b>                              | <b>Term</b>                                           | <b>Count</b> | <b>P-Value</b> | <b>Genes</b>                                                                               | <b>Benjamini</b> |
| GOTERM_CC_FAT                                | GO:0043228~non-membrane-bounded organelle             | 13           | 0.7335         | MRPL41, JUN, FXR2, KIFC2, MARK1, MRPS34, GNE, WASF1, GNL3, ANXA11, RASSF5, SORBS2, PAK1IP1 | 0.9974           |

| GOTERM_CC_FAT                                | GO:0043232~intracellular non-membrane-bounded organelle | 13    | 0.7335  | MRPL41, JUN, FXR2, KIFC2, MARK1, MRPS34, GNE, WASF1, GNL3, ANXA11, RASSF5, SORBS2, PAK1IP1                                                                                                                                 | 0.9974    |
|----------------------------------------------|---------------------------------------------------------|-------|---------|----------------------------------------------------------------------------------------------------------------------------------------------------------------------------------------------------------------------------|-----------|
| GOTERM_CC_FAT                                | GO:0005856~cytoskeleton                                 | 7     | 0.7447  | KIFC2, MARK1, GNE, WASF1, ANXA11, RASSF5, SORBS2                                                                                                                                                                           | 0.9974    |
| <b>Annotation Cluster 37</b>                 |                                                         |       |         |                                                                                                                                                                                                                            |           |
| <b>Enrichment Score: 0.11824527499037826</b> |                                                         |       |         |                                                                                                                                                                                                                            |           |
| Category                                     | Term                                                    | Count | P-Value | Genes                                                                                                                                                                                                                      | Benjamini |
| SP_PIR_KEYWORDS                              | Glycoprotein                                            | 25    | 0.3715  | CADM4, PCSK2, NOTCH4, RTEL1, CRHBP, TYRO3, ANXA11, RTN4RL2, GPR162, ARTN, KCNH1, PLAT, PGLYRP1, BAI1, DSCAM, TENM3, GRIK5, HS3ST2, ADRA1B, CHPF2, DMP1, PLA1A, TSPAN2, ADRM1, KCNK12                                       | 0.9577    |
| UP_SEQ_FEATURE                               | Glycosylation site:N-linked (GlcNAc...)                 | 23    | 0.4798  | GRIK5, CADM4, HS3ST2, PCSK2, NOTCH4, ADRA1B, RTEL1, CRHBP, TYRO3, CHPF2, DMP1, RTN4RL2, PLA1A, GPR162, ARTN, TSPAN2, KCNH1, PLAT, PGLYRP1, DSCAM, BAI1, TENM3, KCNK12                                                      | 0.9999    |
| UP_SEQ_FEATURE                               | Topological domain: Cytoplasmic                         | 17    | 0.6918  | GRIK5, CADM4, PMEPA1, HS3ST2, NOTCH4, ADRA1B, TYRO3, CHPF2, SYT12, GPR162, SEC61A2, TSPAN2, KCNH1, DSCAM, BAI1, TENM3, KCNK12                                                                                              | 1         |
| SP_PIR_KEYWORDS                              | Membrane                                                | 29    | 0.8440  | PITPNM1, CADM4, CYP46A1, NOTCH4, CAMK1G, COQ7, NUMB, LIPE, TYRO3, RTN4RL2, SYT12, GPR162, CNKSR3, KCNH1, DSCAM, BAI1, TENM3, GRIK5, HS3ST2, PMEPA1, STRN3, ADRA1B, RIMBP2, CHPF2, SEC61A2, TSPAN2, SLC35F4, COQ10B, KCNK12 | 0.9980    |
| UP_SEQ_FEATURE                               | Topological domain: Extracellular                       | 11    | 0.9122  | CADM4, GRIK5, GPR162, PMEPA1, NOTCH4, ADRA1B, TSPAN2, DSCAM, BAI1, TENM3, TYRO3                                                                                                                                            | 1         |
| UP_SEQ_FEATURE                               | Transmembrane                                           | 19    | 0.9702  | GRIK5, CADM4, CYP46A1, PMEPA1, HS3ST2, NOTCH4,                                                                                                                                                                             | 1         |

|                                              | region                                           |       |         | ADRA1B, TYRO3, CHPF2, SYT12, SEC61A2, GPR162, TSPAN2, KCNH1, SLC35F4, DSCAM, BAI1, TENM3, KCNK12                                                                      |           |
|----------------------------------------------|--------------------------------------------------|-------|---------|-----------------------------------------------------------------------------------------------------------------------------------------------------------------------|-----------|
| SP_PIR_KEYWORDS                              | Transmembrane                                    | 19    | 0.9725  | GRIK5, CADM4, CYP46A1, PMEPA1, HS3ST2, NOTCH4, ADRA1B, TYRO3, CHPF2, SYT12, SEC61A2, GPR162, TSPAN2, KCNH1, SLC35F4, DSCAM, BAI1, TENM3, KCNK12                       | 1         |
| GOTERM_CC_FAT                                | GO:0031224~intrinsic to membrane                 | 22    | 0.9808  | GRIK5, CADM4, CYP46A1, HS3ST2, PMEPA1, NOTCH4, ADRA1B, NUMB, TYRO3, CHPF2, RTN4RL2, SYT12, SEC61A2, GPR162, TSPAN2, KCNH1, SLC35F4, DSCAM, BAI1, TENM3, ADRM1, KCNK12 | 1         |
| GOTERM_CC_FAT                                | GO:0016021~integral to membrane                  | 21    | 0.9816  | GRIK5, CADM4, CYP46A1, PMEPA1, HS3ST2, NOTCH4, ADRA1B, NUMB, TYRO3, CHPF2, SYT12, SEC61A2, GPR162, TSPAN2, KCNH1, SLC35F4, DSCAM, BAI1, TENM3, ADRM1, KCNK12          | 1         |
| <b>Annotation Cluster 38</b>                 |                                                  |       |         |                                                                                                                                                                       |           |
| <b>Enrichment Score: 0.09134641011708738</b> |                                                  |       |         |                                                                                                                                                                       |           |
| Category                                     | Term                                             | Count | P-Value | Genes                                                                                                                                                                 | Benjamini |
| GOTERM_BP_FAT                                | GO:0030001~metal ion transport                   | 3     | 0.7604  | CAMK2G, KCNH1, KCNK12                                                                                                                                                 | 0.9998    |
| GOTERM_BP_FAT                                | GO:0006811~ion transport                         | 4     | 0.8337  | GRIK5, CAMK2G, KCNH1, KCNK12                                                                                                                                          | 1         |
| GOTERM_BP_FAT                                | GO:0006812~cation transport                      | 3     | 0.8393  | CAMK2G, KCNH1, KCNK12                                                                                                                                                 | 1         |
| <b>Annotation Cluster 39</b>                 |                                                  |       |         |                                                                                                                                                                       |           |
| <b>Enrichment Score: 0.0691244064620221</b>  |                                                  |       |         |                                                                                                                                                                       |           |
| Category                                     | Term                                             | Count | P-Value | Genes                                                                                                                                                                 | Benjamini |
| GOTERM_BP_FAT                                | GO:0015031~protein transport                     | 4     | 0.8297  | JUN, SEC61A2, PITPNM1, SCG2                                                                                                                                           | 1         |
| GOTERM_BP_FAT                                | GO:0045184~establishment of protein localization | 4     | 0.8343  | JUN, SEC61A2, PITPNM1, SCG2                                                                                                                                           | 1         |
| GOTERM_BP_FAT                                | GO:0008104~protein localization                  | 4     | 0.8962  | JUN, SEC61A2, PITPNM1, SCG2                                                                                                                                           | 1         |

| <b>Annotation Cluster 40</b>                 |                                         |              |                |                                                                                                                                                             |                  |
|----------------------------------------------|-----------------------------------------|--------------|----------------|-------------------------------------------------------------------------------------------------------------------------------------------------------------|------------------|
| <b>Enrichment Score: 0.06420315397565153</b> |                                         |              |                |                                                                                                                                                             |                  |
| <b>Category</b>                              | <b>Term</b>                             | <b>Count</b> | <b>P-Value</b> | <b>Genes</b>                                                                                                                                                | <b>Benjamini</b> |
| SP_PIR_KEYWORDS                              | Metal-binding                           | 15           | 0.6830         | PDE4B, KLF9, PITPNM1, CYP46A1, COQ7, RTEL1, MARK1, MAP3K6, RASSF5, ZMYND8, LIMK1, PHRF1, ASPA, SIK1, PFKP                                                   | 0.9921           |
| GOTERM_MF_FAT                                | GO:0046872~metal ion binding            | 22           | 0.7554         | TESC, PITPNM1, KLF9, CYP46A1, SCG2, NOTCH4, COQ7, RTEL1, MARK1, ANXA11, RASSF5, DMP1, MAP3K6, ZMYND8, LIMK1, PHRF1, ASPA, KCNH1, SIK1, PFKP, SORBS2, KCNK12 | 0.9999           |
| GOTERM_MF_FAT                                | GO:0043169~cation binding               | 22           | 0.7722         | TESC, PITPNM1, KLF9, CYP46A1, SCG2, NOTCH4, COQ7, RTEL1, MARK1, ANXA11, RASSF5, DMP1, MAP3K6, ZMYND8, LIMK1, PHRF1, ASPA, KCNH1, SIK1, PFKP, SORBS2, KCNK12 | 0.9999           |
| GOTERM_MF_FAT                                | GO:0043167~ion binding                  | 22           | 0.7975         | TESC, PITPNM1, KLF9, CYP46A1, SCG2, NOTCH4, COQ7, RTEL1, MARK1, ANXA11, RASSF5, DMP1, MAP3K6, ZMYND8, LIMK1, PHRF1, ASPA, KCNH1, SIK1, PFKP, SORBS2, KCNK12 | 0.9999           |
| GOTERM_MF_FAT                                | GO:0046914~transition metal ion binding | 10           | 0.9847         | ZMYND8, KLF9, CYP46A1, LIMK1, COQ7, PHRF1, RTEL1, ASPA, RASSF5, SORBS2                                                                                      | 1                |
| SP_PIR_KEYWORDS                              | Zinc                                    | 6            | 0.9909         | ZMYND8, KLF9, LIMK1, PHRF1, ASPA, RASSF5                                                                                                                    | 1                |
| GOTERM_MF_FAT                                | GO:0008270~zinc ion binding             | 7            | 0.9938         | ZMYND8, KLF9, LIMK1, PHRF1, ASPA, RASSF5, SORBS2                                                                                                            | 1                |
| SP_PIR_KEYWORDS                              | Zinc-finger                             | 4            | 0.9946         | ZMYND8, KLF9, PHRF1, RASSF5                                                                                                                                 | 1                |



| <b>Annotation Cluster 41</b>                  |                                                                 |              |                |                                                       |                  |
|-----------------------------------------------|-----------------------------------------------------------------|--------------|----------------|-------------------------------------------------------|------------------|
| <b>Enrichment Score: 0.023405171688667542</b> |                                                                 |              |                |                                                       |                  |
| <b>Category</b>                               | <b>Term</b>                                                     | <b>Count</b> | <b>P-Value</b> | <b>Genes</b>                                          | <b>Benjamini</b> |
| SP_PIR_KEYWORDS                               | G-protein coupled receptor                                      | 3            | 0.9268         | GPR162, ADRA1B, BAI1                                  | 0.9998           |
| GOTERM_BP_FAT                                 | GO:0007166~cell surface receptor linked signal transduction     | 8            | 0.9300         | JUN, GPR162, NOTCH4, CNKSR3, ADRA1B, PLAT, BAI1, TLE3 | 1                |
| SP_PIR_KEYWORDS                               | Transducer                                                      | 3            | 0.9432         | GPR162, ADRA1B, BAI1                                  | 0.9999           |
| GOTERM_BP_FAT                                 | GO:0007186~G-protein coupled receptor protein signaling pathway | 3            | 0.99151        | GPR162, ADRA1B, BAI1                                  | 1                |
